# Supplementary material
Source: PubMed Central journal article supplement (PMC6676485)
Supplement: NIHMS1042192-supplement-table.pdf [file NIHMS1042192-supplement-table.pdf]

Supplementary Table I. Quantification of transcript levels from CD19 CAR T cells collected from patients undergoing CRS.

| Gene name      | Grade 2<br>(T cells) | Grade 2<br>(T cells) | Grade 2<br>(T cells) | Grade 3<br>T cells | Grade 4<br>(T cells) | Grade 4<br>(T cells) | Grade 4<br>(T cells) | Grade 4<br>(ALL<br>only) | Grade 4<br>(ALL<br>only) | Grade 3<br>(ALL<br>only) |
|----------------|----------------------|----------------------|----------------------|--------------------|----------------------|----------------------|----------------------|--------------------------|--------------------------|--------------------------|
| <i>ABCB1</i>   | 25.37                | 89.95                | 5.74                 | 1                  | 1.06                 | 15.96                | 3.93                 | 92.69                    | 52.37                    | 1.39                     |
| <i>ABCF1</i>   | 108.78               | 109.07               | 110.29               | 70.87              | 73.28                | 111.15               | 87.75                | 153.84                   | 176.58                   | 117.18                   |
| <i>ABL1</i>    | 27.38                | 33.4                 | 8.91                 | 50.03              | 64.81                | 34.62                | 229.2                | 33.77                    | 41.84                    | 2.23                     |
| <i>ADA</i>     | 151.98               | 152.24               | 156.22               | 190.7              | 239.51               | 181.95               | 360.17               | 126.04                   | 203.95                   | 52.61                    |
| <i>AHR</i>     | 828.25               | 36.13                | 423.92               | 135.88             | 159.36               | 176.68               | 480.66               | 156.06                   | 132.37                   | 172.85                   |
| <i>AICDA</i>   | 1                    | 1                    | 1.58                 | 20.13              | 7.18                 | 1                    | 2.62                 | 1.11                     | 2.11                     | 2.23                     |
| <i>AIRE</i>    | 1.26                 | 29.85                | 1.58                 | 6.77               | 8.62                 | 1.61                 | 2.62                 | 12.65                    | 2.11                     | 2.23                     |
| <i>ALAS1</i>   | 38.44                | 21.92                | 27.92                | 17.19              | 19.79                | 33.66                | 11.79                | 25.99                    | 3.95                     | 28.11                    |
| <i>APP</i>     | 168.06               | 21.38                | 454.02               | 101                | 111.82               | 82.93                | 286.82               | 62.67                    | 54.47                    | 114.96                   |
| <i>ARG1</i>    | 1                    | 1                    | 67.52                | 1.1                | 1.42                 | 1.14                 | 2.62                 | 3.75                     | 2.11                     | 72.65                    |
| <i>ARG2</i>    | 1                    | 1                    | 39.01                | 1                  | 1.78                 | 1                    | 2.62                 | 1.11                     | 2.11                     | 2.23                     |
| <i>ARHGDI3</i> | 1563.8               | 1679.92              | 1794.09              | 1028.15            | 1217.43              | 1335.68              | 1874.18              | 1451.24                  | 1841.86                  | 1248.38                  |
| <i>ATG10</i>   | 43.46                | 33.67                | 58.01                | 38.71              | 42.3                 | 30.79                | 30.12                | 49.33                    | 39.74                    | 86.01                    |
| <i>ATG12</i>   | 7.29                 | 6.9                  | 1.58                 | 13.56              | 11.5                 | 10.22                | 22.26                | 1.11                     | 2.11                     | 2.23                     |
| <i>ATG16L1</i> | 73.61                | 95.69                | 31.09                | 26.25              | 17.27                | 85.32                | 92.99                | 121.6                    | 159.74                   | 86.01                    |
| <i>ATG5</i>    | 80.64                | 77.38                | 46.93                | 53.88              | 60.85                | 77.19                | 61.56                | 97.14                    | 98.69                    | 68.19                    |
| <i>ATG7</i>    | 33.41                | 43.78                | 31.09                | 13.11              | 19.61                | 50.4                 | 35.36                | 29.32                    | 12.37                    | 175.08                   |
| <i>ATM</i>     | 6.28                 | 6.62                 | 1.58                 | 1                  | 1.42                 | 1                    | 2.62                 | 1.11                     | 2.11                     | 2.23                     |
|                | 31925.3              | 15571.6              | 52872.1              |                    |                      | 28436.0              | 19091.4              |                          |                          |                          |
| <i>B2M</i>     | 7                    | 6                    | 9                    | 7188.87            | 6402.97              | 4                    | 7                    | 16497.5                  | 26602.12                 | 37411.19                 |
| <i>B3GAT1</i>  | 1                    | 1                    | 1.58                 | 1                  | 1                    | 14.53                | 2.62                 | 1.11                     | 2.11                     | 2.23                     |
| <i>BATF</i>    | 40.45                | 47.33                | 39.01                | 5.41               | 1.24                 | 49.45                | 6.55                 | 44.89                    | 31.32                    | 139.45                   |
| <i>BATF3</i>   | 7.29                 | 3.35                 | 67.52                | 1                  | 1                    | 12.62                | 3.93                 | 1.11                     | 2.11                     | 19.21                    |
| <i>BAX</i>     | 333.86               | 232.28               | 229.09               | 217.43             | 224.38               | 366.58               | 425.65               | 188.3                    | 248.16                   | 299.78                   |
| <i>BCAP31</i>  | 179.11               | 93.23                | 260.77               | 84.69              | 121.36               | 132.68               | 218.72               | 87.13                    | 147.11                   | 250.79                   |
| <i>BCL10</i>   | 256.49               | 104.43               | 240.18               | 109.16             | 117.04               | 133.16               | 179.43               | 98.25                    | 168.16                   | 417.8                    |

|                  |        |        |        |        |        |        |        |        |        |         |
|------------------|--------|--------|--------|--------|--------|--------|--------|--------|--------|---------|
| <i>BCL2</i>      | 11.3   | 69.73  | 7.33   | 67.48  | 83.18  | 33.66  | 40.6   | 97.14  | 100.79 | 43.7    |
| <i>BCL2L11</i>   | 87.67  | 216.71 | 159.39 | 9.03   | 3.22   | 105.41 | 37.98  | 251.67 | 294.48 | 293.1   |
| <i>BCL3</i>      | 257.49 | 60.44  | 886.45 | 6.99   | 7.36   | 103.98 | 37.98  | 325.04 | 307.11 | 1292.92 |
| <i>BCL6</i>      | 104.76 | 1.43   | 416    | 27.83  | 19.43  | 68.58  | 74.65  | 276.13 | 155.53 | 2985.27 |
| <i>BID</i>       | 6.28   | 2.8    | 1.58   | 1      | 1.24   | 1      | 2.62   | 7.09   | 2.11   | 5.85    |
| <i>BLNK</i>      | 1      | 1      | 1.58   | 133.62 | 153.42 | 1      | 226.58 | 1.11   | 2.11   | 2.23    |
| <i>BST1</i>      | 408.22 | 1      | 149.89 | 11.98  | 8.8    | 113.54 | 14.41  | 23.76  | 2.11   | 310.91  |
| <i>BST2</i>      | 73.61  | 107.43 | 86.53  | 119.58 | 89.31  | 135.07 | 176.81 | 53.78  | 69.21  | 179.53  |
| <i>BTK</i>       | 35.42  | 1      | 42.17  | 80.84  | 78.86  | 33.66  | 51.08  | 8.2    | 1.84   | 81.56   |
| <i>BTLA</i>      | 7.29   | 8.81   | 23.17  | 1      | 1      | 58.54  | 11.79  | 12.65  | 1.84   | 16.98   |
| <i>C14orf166</i> | 501.67 | 607.37 | 530.05 | 540.23 | 514.88 | 473.73 | 928.58 | 548.5  | 572.37 | 448.97  |
| <i>CIQA</i>      | 17.33  | 1      | 1.58   | 1      | 1      | 17.4   | 2.62   | 1.11   | 2.11   | 2.23    |
| <i>CIQB</i>      | 6.28   | 1.43   | 1.58   | 1      | 1      | 76.23  | 3.93   | 1.11   | 2.11   | 10.3    |
| <i>CIQBP</i>     | 187.15 | 267.25 | 275.02 | 672.97 | 495.24 | 258    | 737.36 | 247.22 | 254.48 | 137.22  |
| <i>CIR</i>       | 2.26   | 9.08   | 1.58   | 3.14   | 3.4    | 1      | 3.93   | 1.11   | 2.11   | 2.23    |
| <i>CIS</i>       | 1.26   | 2.8    | 1.58   | 1      | 1      | 1      | 17.03  | 1.11   | 2.11   | 5.85    |
| <i>C2</i>        | 81.64  | 7.72   | 81.77  | 2.92   | 6.64   | 70.97  | 6.55   | 14.87  | 6.05   | 117.18  |
| <i>C3</i>        | 1      | 1      | 1.58   | 1      | 1      | 3.53   | 2.62   | 1.11   | 2.11   | 2.23    |
| <i>C4A/B</i>     | 1      | 2.53   | 1.58   | 1      | 1.24   | 1      | 22.26  | 1      | 2.11   | 41.47   |
| <i>C4BPA</i>     | 17.33  | 13.73  | 81.77  | 10.62  | 6.1    | 26.49  | 17.03  | 33.77  | 22.89  | 77.1    |
| <i>C5</i>        | 3.27   | 1      | 5.74   | 2.01   | 1      | 1      | 2.62   | 1.11   | 2.11   | 2.23    |
| <i>C6</i>        | 25.37  | 8.54   | 48.51  | 7.45   | 6.1    | 16.92  | 40.6   | 33.77  | 33.42  | 52.61   |
| <i>C7</i>        | 1      | 1      | 1.58   | 1      | 1      | 1.61   | 2.62   | 4.86   | 2.11   | 3.62    |
| <i>C8A</i>       | 1      | 1      | 1.58   | 1      | 1      | 1      | 2.62   | 1.11   | 2.11   | 2.23    |
| <i>C8B</i>       | 1      | 1      | 1.58   | 1      | 1      | 1      | 2.62   | 1.11   | 2.11   | 2.23    |
| <i>C8G</i>       | 1      | 2.53   | 1.58   | 1      | 1      | 1      | 2.62   | 1.11   | 2.11   | 2.23    |
| <i>C9</i>        | 1      | 1      | 1.58   | 1      | 1      | 1      | 2.62   | 1.11   | 2.11   | 2.23    |
| <i>CAMP</i>      | 1      | 1      | 1.58   | 1      | 1      | 1      | 2.62   | 1.11   | 2.11   | 2.23    |
| <i>CARD9</i>     | 1.26   | 1      | 1.58   | 1      | 1      | 3.05   | 2.62   | 1.11   | 2.11   | 2.23    |
| <i>CASP1</i>     | 411.24 | 131.47 | 422.34 | 193.65 | 130.01 | 526.82 | 95.61  | 162.73 | 231.32 | 426.71  |
| <i>CASP10</i>    | 1      | 1      | 1.58   | 1      | 1      | 1.61   | 2.62   | 1.11   | 2.11   | 2.23    |

|              |         |         |         |        |        |         |        |         |         |         |
|--------------|---------|---------|---------|--------|--------|---------|--------|---------|---------|---------|
| <i>CASP2</i> | 71.6    | 222.45  | 103.95  | 141.55 | 146.94 | 176.21  | 216.1  | 133.83  | 172.37  | 161.72  |
| <i>CASP3</i> | 136.91  | 62.08   | 138.8   | 50.03  | 36.54  | 126.94  | 22.26  | 76.02   | 126.05  | 92.69   |
| <i>CASP8</i> | 396.16  | 590.43  | 1043.27 | 137.24 | 161.34 | 258.96  | 349.69 | 950.95  | 770.27  | 1061.34 |
| <i>CCBP2</i> | 1       | 1       | 1.58    | 1      | 1      | 1       | 2.62   | 1.11    | 2.11    | 2.23    |
| <i>CCL11</i> | 1.26    | 1       | 1.58    | 1      | 1      | 1       | 2.62   | 1       | 2.11    | 2.23    |
| <i>CCL13</i> | 1       | 1       | 1.58    | 1      | 1      | 2.09    | 9.17   | 1.53    | 2.11    | 3.62    |
| <i>CCL15</i> | 1       | 1       | 1.58    | 1      | 1      | 1       | 2.62   | 1.11    | 2.11    | 2.23    |
| <i>CCL16</i> | 1       | 1       | 1.58    | 1      | 1      | 1       | 2.62   | 1.11    | 2.11    | 2.23    |
| <i>CCL18</i> | 1       | 1       | 1.58    | 1      | 1      | 1       | 3.93   | 1.11    | 2.11    | 2.23    |
| <i>CCL19</i> | 2.26    | 1       | 21.58   | 1      | 1      | 1       | 11.79  | 1       | 2.11    | 19.21   |
| <i>CCL2</i>  | 64.56   | 1       | 61.18   | 1      | 1      | 1       | 2.62   | 1.11    | 2.11    | 2.23    |
| <i>CCL20</i> | 1       | 1       | 1.58    | 1      | 1      | 1       | 2.62   | 1.11    | 2.11    | 2.23    |
| <i>CCL22</i> | 1       | 1       | 1.58    | 1      | 1      | 1       | 1.31   | 1.11    | 2.11    | 2.23    |
| <i>CCL23</i> | 1       | 1       | 1.58    | 1      | 1      | 1       | 2.62   | 1.11    | 2.11    | 2.23    |
| <i>CCL24</i> | 1       | 1       | 1.58    | 1      | 1      | 1       | 2.62   | 1.11    | 2.11    | 2.23    |
| <i>CCL26</i> | 1       | 1       | 1.58    | 1      | 1      | 1       | 2.62   | 1.11    | 2.11    | 2.23    |
| <i>CCL3</i>  | 4.27    | 121.36  | 43.76   | 1      | 1      | 18.83   | 2.62   | 409.54  | 50.26   | 2.23    |
| <i>CCL4</i>  | 50.49   | 54.16   | 21.58   | 4.73   | 1      | 74.32   | 1.31   | 192.75  | 153.42  | 81.56   |
| <i>CCL5</i>  | 888.54  | 3718.19 | 2093.47 | 138.83 | 27.71  | 1341.42 | 200.38 | 3179.99 | 3923.99 | 1404.26 |
| <i>CCL7</i>  | 5.28    | 9.9     | 7.33    | 4.96   | 3.04   | 13.09   | 9.17   | 10.42   | 1.84    | 2.23    |
| <i>CCL8</i>  | 8.29    | 13.18   | 13.66   | 5.86   | 5.56   | 15.01   | 2.62   | 4.86    | 3.95    | 23.66   |
| <i>CCND3</i> | 85.66   | 234.74  | 263.94  | 162.84 | 280.93 | 156.59  | 226.58 | 137.16  | 163.95  | 1003.44 |
| <i>CCR1</i>  | 1206.07 | 100.88  | 393.83  | 4.5    | 2.5    | 88.19   | 32.74  | 86.02   | 75.53   | 221.84  |
| <i>CCR10</i> | 1       | 1       | 1.58    | 1      | 1      | 1       | 3.93   | 1.11    | 2.11    | 2.23    |
| <i>CCR2</i>  | 401.19  | 59.62   | 83.36   | 1      | 1      | 159.94  | 2.62   | 10.42   | 33.42   | 12.53   |
| <i>CCR5</i>  | 92.7    | 432.53  | 13.66   | 33.27  | 1      | 275.22  | 3.93   | 116.04  | 311.32  | 37.02   |
| <i>CCR6</i>  | 9.29    | 1.16    | 5.74    | 1      | 3.04   | 4.48    | 11.79  | 1.11    | 2.11    | 5.85    |
| <i>CCR7</i>  | 10.3    | 1       | 34.25   | 1      | 1      | 1       | 2.62   | 1.11    | 2.11    | 2.23    |
| <i>CCR8</i>  | 1       | 1       | 1.58    | 1      | 1      | 1       | 2.62   | 1.11    | 2.11    | 2.23    |
| <i>CCRL1</i> | 1       | 1       | 1.58    | 1      | 1      | 1       | 2.62   | 1.11    | 2.11    | 2.23    |
| <i>CCRL2</i> | 48.48   | 5.53    | 129.3   | 5.63   | 6.64   | 19.31   | 2.62   | 24.88   | 14.47   | 25.89   |

|               |         |        |         |         |         |        |         |         |         |         |
|---------------|---------|--------|---------|---------|---------|--------|---------|---------|---------|---------|
| <i>CD14</i>   | 743.84  | 1      | 187.9   | 1       | 1       | 124.55 | 1.31    | 23.76   | 1.84    | 168.4   |
| <i>CD160</i>  | 1       | 1      | 1.58    | 1       | 1       | 9.27   | 2.62    | 1.11    | 2.11    | 5.85    |
| <i>CD163</i>  | 100.74  | 1      | 51.68   | 1       | 1       | 72.89  | 2.62    | 3.75    | 2.11    | 2.23    |
| <i>CD164</i>  | 349.94  | 198.4  | 349.47  | 290.37  | 289.03  | 352.23 | 323.5   | 321.71  | 363.95  | 399.98  |
| <i>CD19</i>   | 12.31   | 1      | 2.57    | 1022.49 | 856.34  | 1      | 1557.23 | 1.11    | 2.11    | 25.89   |
| <i>CD1A</i>   | 1       | 1      | 1.58    | 1       | 1       | 3.05   | 2.62    | 1.11    | 2.11    | 2.23    |
| <i>CD1D</i>   | 251.46  | 1      | 94.45   | 1       | 1       | 69.54  | 2.62    | 11.53   | 2.11    | 19.21   |
| <i>CD2</i>    | 57.53   | 369.15 | 48.51   | 15.83   | 1.06    | 224.52 | 2.62    | 174.96  | 326.06  | 63.74   |
| <i>CD209</i>  | 1       | 1      | 1.58    | 1       | 1       | 1      | 2.62    | 1.11    | 2.11    | 2.23    |
| <i>CD22</i>   | 1       | 1      | 7.33    | 119.58  | 50.22   | 1      | 352.31  | 1.11    | 2.11    | 2.23    |
| <i>CD24</i>   | 6.28    | 1      | 64.35   | 1077.31 | 1209.33 | 1      | 1366.02 | 72.68   | 25      | 4272.34 |
| <i>CD244</i>  | 95.71   | 24.11  | 7.33    | 2.01    | 1.42    | 83.41  | 3.93    | 33.77   | 18.68   | 23.66   |
| <i>CD247</i>  | 194.19  | 337.46 | 232.26  | 21.94   | 5.02    | 217.34 | 17.03   | 381.74  | 511.32  | 170.63  |
| <i>CD27</i>   | 61.55   | 396.19 | 75.44   | 84.24   | 69.86   | 243.65 | 116.56  | 447.34  | 563.95  | 110.5   |
| <i>CD274</i>  | 4.27    | 9.9    | 423.92  | 1       | 1       | 8.31   | 2.62    | 13.76   | 1.84    | 88.24   |
| <i>CD276</i>  | 4.27    | 1      | 1.58    | 1       | 1       | 2.57   | 1.31    | 1.11    | 2.11    | 2.23    |
| <i>CD28</i>   | 113.8   | 37.5   | 254.43  | 10.17   | 2.5     | 188.16 | 2.62    | 201.64  | 203.95  | 50.38   |
| <i>CD34</i>   | 1       | 1      | 1.58    | 1       | 1       | 1      | 17.03   | 1.11    | 2.11    | 2.23    |
| <i>CD36</i>   | 731.78  | 15.64  | 1044.85 | 6.09    | 6.1     | 587.09 | 370.64  | 38.22   | 35.53   | 460.11  |
| <i>CD3D</i>   | 231.37  | 672.39 | 583.91  | 57.28   | 5.02    | 790.38 | 19.65   | 713.04  | 1191.33 | 442.29  |
| <i>CD3E</i>   | 226.34  | 586.88 | 249.68  | 44.37   | 2.5     | 501.95 | 19.65   | 655.23  | 898.69  | 275.28  |
| <i>CD3EAP</i> | 1       | 2.53   | 1.58    | 1.33    | 5.56    | 1      | 2.62    | 1.11    | 2.11    | 2.23    |
| <i>CD4</i>    | 296.68  | 6.9    | 53.26   | 1       | 1       | 125.98 | 2.62    | 22.65   | 31.32   | 25.89   |
| <i>CD40</i>   | 24.37   | 1      | 56.43   | 19      | 10.42   | 74.32  | 74.65   | 2.64    | 2.11    | 86.01   |
| <i>CD40LG</i> | 10.3    | 1      | 24.75   | 1       | 1       | 26.49  | 3.93    | 15.98   | 1.84    | 8.07    |
| <i>CD44</i>   | 1483.41 | 821.01 | 2072.88 | 93.07   | 87.14   | 670.8  | 315.64  | 1910.38 | 1978.71 | 4125.38 |
| <i>CD45R0</i> | 255.48  | 358.77 | 148.3   | 48.45   | 6.46    | 799.95 | 19.65   | 128.27  | 336.58  | 894.33  |
| <i>CD45RA</i> | 115.81  | 21.92  | 113.45  | 3.37    | 2.32    | 103.98 | 187.29  | 107.14  | 52.37   | 90.46   |
| <i>CD45RB</i> | 147.96  | 289.1  | 48.51   | 6.09    | 1       | 309.66 | 19.65   | 146.05  | 418.69  | 152.81  |
| <i>CD46</i>   | 367.02  | 206.87 | 463.52  | 131.81  | 143.15  | 342.66 | 265.87  | 310.59  | 454.48  | 602.62  |
| <i>CD48</i>   | 1189.99 | 519.13 | 685.28  | 115.04  | 55.09   | 885.57 | 255.39  | 531.83  | 643.95  | 506.87  |

|                |         |         |         |         |         |         |         |         |         |          |
|----------------|---------|---------|---------|---------|---------|---------|---------|---------|---------|----------|
| <i>CD5</i>     | 169.07  | 79.29   | 419.17  | 15.6    | 1       | 164.73  | 14.41   | 230.55  | 246.06  | 90.46    |
| <i>CD53</i>    | 1149.8  | 709.27  | 1231.77 | 521.88  | 506.95  | 1107.04 | 902.38  | 584.08  | 1027.12 | 1346.36  |
| <i>CD55</i>    | 1       | 1       | 1.58    | 1       | 1.78    | 1       | 2.62    | 1.11    | 2.11    | 2.23     |
| <i>CD58</i>    | 474.54  | 151.42  | 587.07  | 146.76  | 213.03  | 141.77  | 656.16  | 190.52  | 187.11  | 382.17   |
| <i>CD59</i>    | 61.55   | 337.73  | 406.5   | 71.33   | 80.12   | 66.19   | 148     | 475.13  | 534.48  | 678.33   |
| <i>CD6</i>     | 41.45   | 89.67   | 225.92  | 2.92    | 1       | 110.2   | 2.62    | 117.15  | 109.21  | 30.34    |
| <i>CD7</i>     | 52.5    | 139.12  | 67.52   | 4.05    | 1.42    | 65.71   | 2.62    | 253.89  | 227.11  | 112.73   |
| <i>CD70</i>    | 1       | 95.14   | 1.58    | 8.58    | 16.19   | 34.14   | 6.55    | 64.9    | 43.95   | 2.23     |
|                |         |         |         |         |         |         | 10395.0 |         |         |          |
| <i>CD74</i>    | 7003.06 | 1740.57 | 7909.97 | 3374.02 | 2871.27 | 4392.7  | 7       | 2266.14 | 2159.76 | 13578.03 |
| <i>CD79A</i>   | 3.27    | 1.98    | 1       | 613.39  | 902.26  | 1       | 905     | 1       | 2.11    | 2.23     |
| <i>CD79B</i>   | 8.29    | 7.72    | 15.25   | 253.45  | 396.19  | 4.96    | 543.52  | 14.87   | 18.68   | 14.75    |
| <i>CD80</i>    | 1       | 4.44    | 1.58    | 1       | 1.06    | 1.14    | 2.62    | 22.65   | 2.11    | 2.23     |
| <i>CD81</i>    | 533.83  | 662.28  | 493.62  | 905.15  | 1245.53 | 660.28  | 1219.33 | 659.68  | 955.54  | 286.42   |
| <i>CD82</i>    | 21.35   | 15.64   | 99.2    | 10.62   | 18.17   | 16.92   | 27.5    | 25.99   | 39.74   | 117.18   |
| <i>CD83</i>    | 99.73   | 42.69   | 411.25  | 27.61   | 20.33   | 129.33  | 153.23  | 177.18  | 159.74  | 239.66   |
| <i>CD86</i>    | 161.03  | 20.56   | 72.27   | 4.28    | 3.04    | 53.75   | 2.62    | 3.75    | 2.11    | 2.23     |
| <i>CD8A</i>    | 145.95  | 678.67  | 146.72  | 31.23   | 4.48    | 274.26  | 22.26   | 988.75  | 1243.96 | 172.85   |
| <i>CD8B</i>    | 21.35   | 339.37  | 46.93   | 17.19   | 1.78    | 96.8    | 2.62    | 405.09  | 498.69  | 28.11    |
| <i>CD9</i>     | 148.97  | 82.85   | 130.88  | 484.73  | 953.23  | 31.27   | 58.94   | 88.24   | 126.05  | 97.14    |
| <i>CD96</i>    | 119.83  | 352.21  | 183.15  | 155.59  | 150.36  | 235.04  | 48.46   | 312.82  | 530.27  | 155.04   |
| <i>CD97</i>    | 512.73  | 295.93  | 897.54  | 395.03  | 606.36  | 349.36  | 1174.8  | 617.43  | 580.8   | 2829.39  |
| <i>CD99</i>    | 1232.2  | 1790.83 | 1789.34 | 1471.91 | 2142.05 | 952.06  | 3532.26 | 1266.69 | 1448.17 | 874.29   |
| <i>CDH5</i>    | 1       | 1       | 1.58    | 1       | 1       | 1       | 2.62    | 1.11    | 2.11    | 2.23     |
| <i>CDKN1A</i>  | 133.9   | 1       | 346.3   | 74.95   | 110.02  | 66.67   | 184.67  | 28.21   | 3.95    | 30.34    |
| <i>CEACAM1</i> | 1       | 1       | 26.33   | 1       | 1       | 6.4     | 2.62    | 9.31    | 1.84    | 404.44   |
| <i>CEACAM6</i> | 5.28    | 1.16    | 1.58    | 3.82    | 2.68    | 1       | 22.26   | 4.86    | 14.47   | 2.23     |
| <i>CEACAM8</i> | 1       | 1       | 5.74    | 1       | 1       | 1       | 2.62    | 1.11    | 2.11    | 2.23     |
| <i>CEBPB</i>   | 2206.9  | 33.12   | 2584.52 | 6.99    | 12.94   | 463.68  | 103.47  | 1172.19 | 582.9   | 2564.41  |
| <i>CFB</i>     | 1       | 1       | 27.92   | 2.69    | 1.96    | 11.18   | 2.62    | 18.2    | 8.16    | 57.06    |
| <i>CFD</i>     | 197.2   | 1       | 124.54  | 1       | 1       | 30.79   | 2.62    | 1.53    | 2.11    | 150.59   |

|                  |         |        |         |        |        |         |        |         |        |          |
|------------------|---------|--------|---------|--------|--------|---------|--------|---------|--------|----------|
| <i>CFH</i>       | 5.28    | 1.16   | 50.09   | 1      | 1      | 10.22   | 161.09 | 8.2     | 2.11   | 183.99   |
| <i>CFI</i>       | 1       | 1      | 1.58    | 1      | 1      | 1.14    | 2.62   | 1.11    | 2.11   | 2.23     |
| <i>CFP</i>       | 183.13  | 1      | 100.78  | 1      | 1      | 82.93   | 2.62   | 15.98   | 2.11   | 141.68   |
| <i>CHUK</i>      | 122.84  | 125.19 | 178.4   | 74.72  | 80.48  | 147.51  | 189.91 | 206.09  | 178.69 | 351      |
| <i>CIITA</i>     | 4.27    | 10.45  | 1.58    | 31.01  | 36.72  | 19.31   | 32.74  | 1.11    | 2.11   | 653.84   |
| <i>CISH</i>      | 28.39   | 1      | 111.87  | 6.54   | 13.3   | 18.36   | 6.55   | 8.2     | 2.11   | 110.5    |
| <i>CLEC4A</i>    | 210.27  | 3.62   | 347.89  | 3.6    | 2.14   | 108.28  | 14.41  | 92.69   | 52.37  | 1183.81  |
| <i>CLEC4E</i>    | 40.45   | 1      | 148.3   | 1      | 2.86   | 92.02   | 30.12  | 3.75    | 2.11   | 37.02    |
| <i>CLEC5A</i>    | 9.29    | 1      | 1.58    | 1      | 1      | 17.4    | 2.62   | 1.11    | 2.11   | 8.07     |
| <i>CLEC6A</i>    | 1       | 1      | 1.58    | 1      | 1      | 15.49   | 2.62   | 1.53    | 2.11   | 2.23     |
| <i>CLEC7A</i>    | 300.7   | 1      | 243.34  | 1      | 1      | 132.2   | 35.36  | 266.12  | 107.11 | 415.57   |
| <i>CLU</i>       | 5.28    | 1      | 1.58    | 1      | 1      | 1       | 1.31   | 1.11    | 2.11   | 2.23     |
| <i>CMKLR1</i>    | 63.56   | 2.53   | 1.58    | 1      | 1      | 36.05   | 2.62   | 1.11    | 2.11   | 2.23     |
| <i>CR1</i>       | 394.15  | 1      | 332.05  | 1.1    | 1.42   | 75.76   | 77.27  | 128.27  | 105    | 2457.52  |
| <i>CR2</i>       | 1       | 1      | 1.58    | 1      | 1      | 1       | 37.98  | 1.11    | 2.11   | 2.23     |
| <i>CRADD</i>     | 1       | 28.21  | 1.58    | 44.6   | 50.58  | 13.57   | 53.7   | 24.88   | 3.95   | 45.93    |
| <i>CSF1</i>      | 1       | 5.81   | 29.5    | 1      | 1      | 7.83    | 2.62   | 20.43   | 2.11   | 157.27   |
| <i>CSF1R</i>     | 5.28    | 1      | 1.58    | 1      | 1      | 4.96    | 2.62   | 1.11    | 2.11   | 2.23     |
| <i>CSF2</i>      | 1       | 1      | 1.58    | 1      | 1      | 1       | 2.62   | 1.11    | 2.11   | 2.23     |
| <i>CSF2RB</i>    | 254.48  | 1      | 1385.42 | 19.23  | 17.27  | 168.07  | 132.28 | 425.1   | 168.16 | 7986.6   |
| <i>CSF3R</i>     | 587.08  | 1      | 1904.97 | 1      | 1      | 240.3   | 203    | 1531.28 | 709.22 | 11275.55 |
| <i>CTLA4-TM</i>  | 4.27    | 37.22  | 50.09   | 1      | 1      | 46.58   | 2.62   | 68.23   | 178.69 | 2.23     |
| <i>CTLA4_all</i> | 15.32   | 157.7  | 99.2    | 6.31   | 1.42   | 98.24   | 11.79  | 233.88  | 395.53 | 57.06    |
| <i>CTNNB1</i>    | 1285.46 | 534.43 | 1315.72 | 602.52 | 650.49 | 493.34  | 902.38 | 1095.48 | 936.59 | 1604.67  |
| <i>CTSC</i>      | 549.9   | 642.34 | 672.61  | 153.1  | 119.38 | 851.61  | 119.18 | 668.57  | 702.9  | 1439.89  |
| <i>CTSG</i>      | 1       | 1      | 1.58    | 1      | 1      | 1       | 2.62   | 1.11    | 2.11   | 2.23     |
|                  | 10500.9 |        |         |        |        |         |        |         |        |          |
| <i>CTSS</i>      | 4       | 271.35 | 3395.53 | 206.33 | 209.79 | 4617.99 | 624.73 | 564.07  | 652.38 | 1655.88  |
| <i>CUL9</i>      | 11.3    | 30.94  | 1.58    | 21.04  | 22.31  | 27.44   | 56.32  | 34.88   | 27.11  | 32.57    |
| <i>CX3CL1</i>    | 7.29    | 1      | 1.58    | 1      | 1      | 1.61    | 6.55   | 7.09    | 2.11   | 2.23     |
| <i>CX3CR1</i>    | 68.58   | 177.92 | 1.58    | 33.72  | 2.86   | 1063.51 | 2.62   | 29.32   | 142.9  | 224.07   |

|                 |         |         |         |         |         |         |         |         |         |         |
|-----------------|---------|---------|---------|---------|---------|---------|---------|---------|---------|---------|
| <i>CXCL1</i>    | 5.28    | 4.44    | 61.18   | 2.92    | 2.68    | 16.92   | 3.93    | 34.88   | 22.89   | 94.92   |
| <i>CXCL10</i>   | 1       | 1       | 113.45  | 1.78    | 1       | 71.93   | 2.62    | 1.11    | 2.11    | 8.07    |
| <i>CXCL11</i>   | 1       | 1       | 1.58    | 1       | 1       | 1       | 2.62    | 1.11    | 2.11    | 2.23    |
| <i>CXCL12</i>   | 1       | 1       | 1.58    | 1       | 1       | 1       | 2.62    | 1.11    | 2.11    | 1.39    |
| <i>CXCL13</i>   | 1       | 1       | 1.58    | 1       | 1       | 1       | 2.62    | 1.11    | 2.11    | 2.23    |
| <i>CXCL2</i>    | 11.3    | 1       | 31.09   | 1       | 1       | 7.83    | 2.62    | 2.64    | 2.11    | 2.23    |
| <i>CXCL9</i>    | 1       | 1       | 4.16    | 1       | 1       | 1       | 2.62    | 1.11    | 2.11    | 2.23    |
| <i>CXCR1</i>    | 1       | 1.71    | 20      | 1       | 1       | 2.57    | 14.41   | 5.98    | 2.11    | 72.65   |
| <i>CXCR2</i>    | 6.28    | 1.71    | 15.25   | 1       | 1       | 4.01    | 17.03   | 18.2    | 20.79   | 277.51  |
| <i>CXCR3</i>    | 104.76  | 295.11  | 172.06  | 68.83   | 50.76   | 183.86  | 6.55    | 212.76  | 397.64  | 72.65   |
| <i>CXCR4</i>    | 1412.07 | 925.91  | 2657.38 | 1186.27 | 1398.79 | 454.59  | 2324.71 | 3506.84 | 6797.7  | 511.32  |
| <i>CXCR6</i>    | 14.32   | 91.86   | 1.58    | 13.34   | 1       | 65.23   | 2.62    | 43.77   | 75.53   | 8.07    |
| <i>CYBB</i>     | 1221.15 | 1.16    | 837.35  | 149.93  | 199.71  | 705.72  | 69.41   | 82.69   | 48.16   | 1328.55 |
| <i>DEFB1</i>    | 7.29    | 2.25    | 1.58    | 1       | 1       | 1.61    | 2.62    | 2.64    | 2.11    | 2.23    |
| <i>DEFB103A</i> | 1       | 1       | 1.58    | 1       | 1       | 1       | 2.62    | 1.11    | 2.11    | 2.23    |
| <i>DEFB103B</i> | 1       | 1       | 1.58    | 1       | 1       | 1       | 2.62    | 1.11    | 2.11    | 2.23    |
| <i>DEFB4A</i>   | 1       | 1       | 1.58    | 1       | 1       | 1       | 2.62    | 1.11    | 2.11    | 2.23    |
| <i>DPP4</i>     | 22.36   | 258.23  | 20      | 4.05    | 8.44    | 83.89   | 66.79   | 187.19  | 281.85  | 94.92   |
| <i>DUSP4</i>    | 84.66   | 44.87   | 297.2   | 1.56    | 1       | 69.54   | 6.55    | 452.89  | 719.74  | 8.07    |
| <i>EBI3</i>     | 1       | 1       | 1.58    | 1       | 1       | 1       | 2.62    | 1.11    | 2.11    | 2.23    |
| <i>EDNRB</i>    | 7.29    | 1       | 1.58    | 1       | 1       | 1       | 2.62    | 1.11    | 2.11    | 2.23    |
| <i>EEF1G</i>    | 2308.39 | 1592.22 | 2185.34 | 4107.49 | 4087.82 | 1694.43 | 5027.93 | 1682.48 | 2022.92 | 1212.76 |
| <i>EGR1</i>     | 6.28    | 1       | 1.58    | 176.21  | 490.38  | 4.01    | 2.62    | 1.11    | 2.11    | 86.01   |
| <i>EGR2</i>     | 2.26    | 1       | 1.58    | 2.24    | 6.1     | 1       | 2.62    | 1.11    | 2.11    | 2.23    |
| <i>ENTPDI</i>   | 21.35   | 10.45   | 1.58    | 1       | 1       | 6.4     | 2.62    | 54.89   | 20.79   | 135     |
| <i>EOMES</i>    | 3.27    | 6.9     | 1.58    | 1       | 1       | 22.66   | 2.62    | 8.2     | 18.68   | 2.23    |
| <i>ETS1</i>     | 353.96  | 766.09  | 454.02  | 79.71   | 21.59   | 693.76  | 35.36   | 1125.5  | 1305.01 | 328.73  |
| <i>FADD</i>     | 4.27    | 4.17    | 1.58    | 1.33    | 1       | 4.96    | 2.62    | 3.75    | 2.11    | 5.85    |
| <i>FAS</i>      | 2.26    | 23.84   | 1.58    | 1       | 1       | 19.31   | 2.62    | 7.09    | 3.95    | 5.85    |
| <i>FCAR</i>     | 1       | 1       | 1.58    | 1       | 1       | 1       | 2.62    | 1.11    | 2.11    | 2.23    |
| <i>FCERIA</i>   | 7.29    | 1       | 1.58    | 1       | 1       | 3.53    | 2.62    | 1.11    | 2.11    | 2.23    |

|                 |         |         |         |         |         |         |         |         |          |         |
|-----------------|---------|---------|---------|---------|---------|---------|---------|---------|----------|---------|
| <i>FCER1G</i>   | 467.51  | 42.69   | 678.95  | 1       | 1       | 287.66  | 108.7   | 147.17  | 58.68    | 976.72  |
| <i>FCGR1A/B</i> | 9.29    | 1       | 27.92   | 1       | 1       | 17.4    | 1.31    | 1.11    | 2.11     | 86.01   |
| <i>FCGR2A</i>   | 630.29  | 1       | 739.14  | 1       | 1       | 278.57  | 119.18  | 188.3   | 185      | 1562.36 |
| <i>FCGR2A/C</i> | 1291.48 | 7.44    | 1011.59 | 4.05    | 1       | 416.33  | 111.32  | 270.57  | 197.63   | 987.85  |
| <i>FCGR2B</i>   | 9.29    | 1       | 1.58    | 1       | 1       | 1       | 2.62    | 10.42   | 2.11     | 110.5   |
| <i>FCGR3A/B</i> | 853.37  | 63.18   | 503.12  | 7.67    | 1.6     | 998.46  | 192.53  | 369.51  | 515.53   | 2468.66 |
| <i>FCGRT</i>    | 472.53  | 6.08    | 205.33  | 11.07   | 12.94   | 182.42  | 77.27   | 47.11   | 8.16     | 413.34  |
| <i>FKBP5</i>    | 123.85  | 720.2   | 419.17  | 149.7   | 99.39   | 274.26  | 420.41  | 538.5   | 625.01   | 693.92  |
| <i>FN1</i>      | 1       | 1       | 1.58    | 1       | 1       | 5.44    | 2.62    | 1.11    | 2.11     | 2.23    |
| <i>FOXP3</i>    | 1       | 1       | 1.58    | 1       | 1       | 1       | 2.62    | 1.11    | 2.11     | 2.23    |
| <i>FYN</i>      | 253.47  | 542.62  | 428.67  | 44.14   | 24.47   | 399.59  | 111.32  | 667.46  | 751.32   | 123.86  |
| <i>G6PD</i>     | 95.71   | 85.58   | 89.69   | 30.1    | 25.91   | 80.06   | 90.37   | 72.68   | 58.68    | 279.74  |
| <i>GAPDH</i>    | 4457.77 | 3502.64 | 6072.51 | 4737.45 | 4960.39 | 3812.48 | 7773.06 | 3710.29 | 3460.83  | 2646.8  |
| <i>GATA3</i>    | 5.28    | 7.72    | 1.58    | 1       | 1.06    | 5.92    | 19.65   | 19.32   | 10.26    | 8.07    |
| <i>GBP1</i>     | 148.97  | 596.72  | 1196.92 | 105.76  | 46.98   | 623.45  | 43.22   | 100.47  | 117.63   | 1451.02 |
| <i>GBP5</i>     | 74.61   | 1906.67 | 1518.47 | 90.35   | 48.24   | 622.49  | 142.76  | 365.07  | 498.69   | 2867.25 |
| <i>GFII1</i>    | 55.52   | 201.14  | 40.59   | 115.27  | 116.5   | 87.24   | 171.57  | 359.51  | 334.48   | 41.47   |
| <i>GNLY</i>     | 1247.27 | 8607.76 | 67.52   | 68.83   | 6.82    | 1069.73 | 56.32   | 9563.59 | 11684.07 | 2061.16 |
| <i>GP1BB</i>    | 21.35   | 1       | 482.53  | 1       | 1       | 27.92   | 22.26   | 1.11    | 2.11     | 108.28  |
| <i>GPI</i>      | 127.87  | 154.42  | 138.8   | 104.85  | 117.22  | 137.46  | 51.08   | 149.39  | 168.16   | 106.05  |
| <i>GPR183</i>   | 267.54  | 17.01   | 148.3   | 2.92    | 1.42    | 47.53   | 72.03   | 60.45   | 121.84   | 1.39    |
| <i>GUSB</i>     | 75.62   | 39.68   | 78.61   | 30.78   | 28.79   | 44.19   | 9.17    | 72.68   | 73.42    | 81.56   |
| <i>GZMA</i>     | 801.12  | 3858.07 | 496.79  | 175.98  | 16.73   | 2585.56 | 103.47  | 3003.22 | 4772.42  | 2009.94 |
| <i>GZMB</i>     | 654.41  | 4594.59 | 110.29  | 94.88   | 8.26    | 2115.36 | 158.47  | 4690.84 | 5601.9   | 2081.2  |
| <i>GZMK</i>     | 432.34  | 1435.14 | 311.46  | 166.01  | 19.79   | 1207.49 | 27.5    | 1245.56 | 2142.92  | 212.94  |
| <i>HAMP</i>     | 1       | 1       | 1.58    | 1       | 1       | 1       | 2.62    | 1.11    | 2.11     | 2.23    |
| <i>HAVCR2</i>   | 146.96  | 241.57  | 113.45  | 11.98   | 2.14    | 132.2   | 6.55    | 298.36  | 458.69   | 94.92   |
| <i>HFE</i>      | 1       | 1       | 1.58    | 1       | 1       | 1       | 2.62    | 1.11    | 2.11     | 2.23    |
| <i>HLA-A</i>    | 3135.39 | 3225.08 | 5724.03 | 732.77  | 709.38  | 2642.48 | 1769.4  | 3245.58 | 3608.2   | 9260.32 |
| <i>HLA-B</i>    | 5190.31 | 2806.56 | 8912.65 | 1328.3  | 1520.72 | 3519.27 | 3464.15 | 3984.89 | 4540.84  | 8429.73 |
| <i>HLA-C</i>    | 463.49  | 686.32  | 2695.4  | 206.56  | 193.76  | 547.39  | 774.03  | 1334.5  | 1326.07  | 5750.92 |



|                 |         |         |         |         |         |         |         |         |         |         |
|-----------------|---------|---------|---------|---------|---------|---------|---------|---------|---------|---------|
| <i>HLA-DMA</i>  | 579.05  | 63.18   | 552.23  | 139.96  | 128.93  | 270.44  | 514.71  | 211.65  | 109.21  | 1544.55 |
| <i>HLA-DMB</i>  | 580.05  | 42.41   | 305.12  | 94.88   | 76.34   | 361.32  | 428.27  | 109.37  | 65      | 689.46  |
| <i>HLA-DOB</i>  | 4.27    | 38.04   | 16.83   | 10.39   | 12.22   | 6.88    | 95.61   | 1       | 2.11    | 72.65   |
| <i>HLA-DPA1</i> | 2807.8  | 250.04  | 1496.3  | 730.73  | 776.56  | 1204.14 | 3013.62 | 289.47  | 292.37  | 591.49  |
| <i>HLA-DPB1</i> | 3307.22 | 330.9   | 1749.74 | 814.54  | 943.87  | 1196.96 | 7291.09 | 429.55  | 448.16  | 887.65  |
| <i>HLA-DQA1</i> | 707.67  | 1       | 260.77  | 99.19   | 124.96  | 458.9   | 2.62    | 1.11    | 2.11    | 219.62  |
| <i>HLA-DQB1</i> | 502.68  | 1       | 230.67  | 46.86   | 55.81   | 167.6   | 2.62    | 1.11    | 2.11    | 1007.89 |
| <i>HLA-DRA</i>  | 7953.65 | 459.3   | 5724.03 | 2373.24 | 2905.49 | 3468.56 | 9310.64 | 1101.04 | 848.17  | 3394.99 |
| <i>HLA-DRB1</i> | 689.58  | 54.43   | 987.83  | 57.06   | 69.31   | 661.71  | 708.55  | 92.69   | 113.42  | 346.54  |
| <i>HLA-DRB3</i> | 1376.9  | 242.12  | 2609.86 | 216.98  | 200.61  | 779.38  | 677.11  | 862.01  | 319.74  | 5575.01 |
| <i>HPRT1</i>    | 148.97  | 195.13  | 135.63  | 203.16  | 201.51  | 248.91  | 310.4   | 272.79  | 323.95  | 172.85  |
| <i>HRAS</i>     | 24.37   | 30.67   | 23.17   | 32.14   | 33.12   | 18.83   | 9.17    | 28.21   | 10.26   | 21.43   |
| <i>ICAM1</i>    | 249.45  | 18.1    | 568.07  | 13.56   | 12.94   | 106.37  | 30.12   | 173.85  | 96.58   | 1620.26 |
| <i>ICAM2</i>    | 47.48   | 11.54   | 103.95  | 31.01   | 54.55   | 48.97   | 37.98   | 13.76   | 12.37   | 83.78   |
| <i>ICAM3</i>    | 578.04  | 424.88  | 612.42  | 111.87  | 84.26   | 404.37  | 318.26  | 509.59  | 669.22  | 1063.56 |
| <i>ICAM4</i>    | 1       | 1       | 1.58    | 1       | 1.78    | 1       | 2.62    | 1       | 2.11    | 70.42   |
| <i>ICAM5</i>    | 1       | 1       | 1.58    | 1       | 1       | 1       | 2.62    | 1.11    | 2.11    | 2.23    |
| <i>ICOS</i>     | 39.44   | 51.43   | 197.41  | 1       | 1.6     | 82.93   | 2.62    | 137.16  | 107.11  | 39.25   |
| <i>ICOSLG</i>   | 101.74  | 4.17    | 48.51   | 53.2    | 42.66   | 14.05   | 205.62  | 84.91   | 58.68   | 32.57   |
| <i>IDO1</i>     | 5.28    | 4.71    | 27.92   | 1       | 1       | 19.79   | 2.62    | 7.09    | 2.11    | 1.39    |
| <i>IFI16</i>    | 284.62  | 743.97  | 406.5   | 459.36  | 408.62  | 658.84  | 493.76  | 406.2   | 412.37  | 555.86  |
| <i>IFI35</i>    | 73.61   | 126.28  | 149.89  | 39.84   | 34.56   | 147.98  | 98.23   | 63.79   | 86.05   | 664.97  |
| <i>IFIH1</i>    | 35.42   | 74.1    | 214.83  | 45.05   | 36.72   | 65.23   | 48.46   | 79.35   | 81.84   | 426.71  |
| <i>IFIT2</i>    | 72.6    | 4.71    | 408.08  | 11.98   | 6.82    | 15.01   | 30.12   | 47.11   | 25      | 310.91  |
| <i>IFITM1</i>   | 1081.47 | 2542.11 | 2725.49 | 2373.24 | 2839.57 | 1702.56 | 6651.96 | 2401.77 | 3193.45 | 3018.67 |
| <i>IFNA1/13</i> | 1       | 1       | 1.58    | 1       | 1       | 1       | 2.62    | 1.11    | 2.11    | 2.23    |
| <i>IFNA2</i>    | 1       | 1       | 1.58    | 1       | 1       | 1       | 2.62    | 1.11    | 2.11    | 2.23    |
| <i>IFNAR1</i>   | 6.28    | 5.26    | 1.58    | 2.69    | 8.08    | 7.83    | 2.62    | 4.86    | 2.11    | 8.07    |
| <i>IFNAR2</i>   | 887.53  | 178.19  | 547.47  | 96.24   | 93.81   | 281.92  | 294.68  | 327.27  | 309.21  | 546.95  |
| <i>IFNB1</i>    | 1       | 1       | 1.58    | 1       | 1       | 1       | 2.62    | 1.53    | 2.11    | 2.23    |
| <i>IFNG</i>     | 15.32   | 139.67  | 1.58    | 13.11   | 1       | 109.24  | 2.62    | 126.04  | 22.89   | 23.66   |

|                |         |        |         |       |       |        |        |        |         |         |
|----------------|---------|--------|---------|-------|-------|--------|--------|--------|---------|---------|
| <i>IFNGR1</i>  | 1364.84 | 34.22  | 1326.81 | 67.48 | 71.3  | 260.87 | 134.9  | 797.53 | 563.95  | 963.36  |
| <i>IGF2R</i>   | 69.59   | 169.99 | 148.3   | 60.23 | 97.23 | 106.85 | 45.84  | 149.39 | 201.84  | 197.35  |
| <i>IKBKAP</i>  | 11.3    | 67.55  | 1       | 23.98 | 20.51 | 51.84  | 58.94  | 19.32  | 56.58   | 52.61   |
| <i>IKBKB</i>   | 41.45   | 112.9  | 1.58    | 39.39 | 34.92 | 85.32  | 64.18  | 47.11  | 52.37   | 59.29   |
| <i>IKBKE</i>   | 64.56   | 163.98 | 40.59   | 23.76 | 12.4  | 96.8   | 35.36  | 116.04 | 145     | 88.24   |
| <i>IKBKG</i>   | 49.49   | 91.04  | 121.38  | 23.53 | 27.35 | 68.58  | 22.26  | 103.81 | 105     | 206.25  |
| <i>IKZF1</i>   | 31.4    | 83.94  | 5.74    | 51.62 | 45.36 | 98.72  | 35.36  | 44.89  | 79.74   | 54.83   |
| <i>IKZF2</i>   | 26.38   | 48.7   | 1.58    | 63.17 | 76.16 | 65.71  | 40.6   | 51.56  | 67.11   | 79.33   |
| <i>IKZF3</i>   | 21.35   | 145.95 | 2.57    | 42.78 | 40.14 | 101.59 | 2.62   | 97.14  | 94.47   | 21.43   |
| <i>IL10</i>    | 25.37   | 4.99   | 7.33    | 3.14  | 1     | 28.4   | 3.93   | 4.86   | 2.11    | 2.23    |
| <i>IL10RA</i>  | 971.94  | 540.44 | 750.23  | 44.82 | 5.74  | 568.92 | 72.03  | 801.98 | 1275.54 | 840.89  |
| <i>IL11RA</i>  | 1       | 6.35   | 1.58    | 2.46  | 3.22  | 4.01   | 2.62   | 1.11   | 8.16    | 2.23    |
| <i>IL12A</i>   | 2.26    | 7.72   | 1.58    | 6.99  | 7.36  | 3.53   | 17.03  | 1      | 2.11    | 2.23    |
| <i>IL12B</i>   | 1       | 1      | 1.58    | 1     | 1     | 1      | 2.62   | 1.11   | 2.11    | 2.23    |
| <i>IL12RB1</i> | 21.35   | 71.92  | 7.33    | 6.09  | 1.6   | 49.45  | 9.17   | 68.23  | 79.74   | 110.5   |
| <i>IL13</i>    | 1       | 1.43   | 1.58    | 1     | 1.24  | 1      | 3.93   | 1.11   | 2.11    | 2.23    |
| <i>IL13RA1</i> | 209.26  | 1      | 164.14  | 14.02 | 3.58  | 93.93  | 51.08  | 7.09   | 6.05    | 208.48  |
| <i>IL15</i>    | 20.35   | 1.43   | 15.25   | 1     | 3.76  | 17.88  | 2.62   | 5.98   | 2.11    | 23.66   |
| <i>IL16</i>    | 350.94  | 149.78 | 256.02  | 98.06 | 94.17 | 245.09 | 121.8  | 261.68 | 267.11  | 288.65  |
| <i>IL17A</i>   | 1       | 1      | 1.58    | 1     | 1     | 1      | 2.62   | 1.11   | 2.11    | 2.23    |
| <i>IL17B</i>   | 1       | 1      | 1.58    | 1     | 1     | 1      | 2.62   | 1.11   | 2.11    | 2.23    |
| <i>IL17F</i>   | 1       | 1      | 1.58    | 1     | 1     | 1      | 2.62   | 1.11   | 2.11    | 2.23    |
| <i>IL18</i>    | 34.42   | 1      | 7.33    | 13.34 | 15.47 | 10.7   | 2.62   | 1      | 2.11    | 14.75   |
| <i>IL18R1</i>  | 21.35   | 37.5   | 43.76   | 1     | 1     | 54.71  | 9.17   | 208.31 | 153.42  | 725.09  |
| <i>IL18RAP</i> | 34.42   | 58.53  | 46.93   | 2.92  | 1.24  | 46.58  | 61.56  | 197.19 | 189.21  | 1482.2  |
| <i>IL19</i>    | 1       | 1      | 1.58    | 1     | 1     | 1      | 2.62   | 1.11   | 2.11    | 2.23    |
| <i>IL1A</i>    | 1       | 1      | 1.58    | 1     | 1     | 1      | 2.62   | 1.11   | 2.11    | 2.23    |
| <i>IL1B</i>    | 56.52   | 1      | 50.09   | 9.94  | 31.49 | 8.31   | 9.17   | 1.11   | 2.11    | 1.39    |
| <i>IL1R1</i>   | 9.29    | 1      | 2.57    | 1     | 1     | 1.61   | 9.17   | 3.75   | 2.11    | 48.15   |
| <i>IL1R2</i>   | 20.35   | 6.62   | 72.27   | 1     | 2.86  | 12.14  | 45.84  | 351.73 | 176.58  | 4913.65 |
| <i>IL1RAP</i>  | 269.55  | 46.24  | 656.77  | 23.3  | 23.21 | 25.53  | 231.82 | 222.76 | 100.79  | 1333    |

|                |         |         |         |         |         |         |         |           |           |           |
|----------------|---------|---------|---------|---------|---------|---------|---------|-----------|-----------|-----------|
| <i>IL1RL1</i>  | 1       | 1       | 1.58    | 1       | 1       | 1       | 2.62    | 1         | 2.11      | 2.23      |
| <i>IL1RL2</i>  | 1       | 1       | 1.58    | 1       | 1       | 1       | 2.62    | 1.11      | 2.11      | 2.23      |
| <i>IL1RN</i>   | 4.27    | 1       | 77.02   | 1       | 1       | 8.31    | 2.62    | 1.11      | 2.11      | 81.56     |
| <i>IL2</i>     | 1       | 1       | 1.58    | 1       | 1       | 1       | 2.62    | 1.11      | 2.11      | 2.23      |
| <i>IL20</i>    | 1       | 1       | 1.58    | 1       | 1       | 1       | 2.62    | 1.11      | 2.11      | 2.23      |
| <i>IL21</i>    | 1       | 1       | 1.58    | 1       | 1       | 4.48    | 2.62    | 1.11      | 2.11      | 2.23      |
| <i>IL21R</i>   | 28.39   | 25.75   | 51.68   | 3.82    | 5.56    | 21.7    | 2.62    | 44.89     | 31.32     | 3.62      |
| <i>IL22</i>    | 1       | 1       | 1.58    | 1       | 1       | 1       | 2.62    | 1.11      | 2.11      | 2.23      |
| <i>IL22RA2</i> | 1       | 1       | 1.58    | 1       | 1       | 1       | 2.62    | 1.11      | 2.11      | 2.23      |
| <i>IL23A</i>   | 1.26    | 1.43    | 1.58    | 1       | 1       | 1       | 2.62    | 3.75      | 1.84      | 2.23      |
| <i>IL23R</i>   | 1       | 2.25    | 1.58    | 1       | 1       | 3.05    | 2.62    | 3.75      | 6.05      | 2.23      |
| <i>IL26</i>    | 1       | 1       | 1.58    | 1       | 1       | 1       | 2.62    | 1.11      | 2.11      | 1.39      |
| <i>IL27</i>    | 1       | 1       | 21.58   | 1       | 1       | 1.14    | 2.62    | 1.11      | 2.11      | 50.38     |
| <i>IL28A</i>   | 1       | 1       | 1.58    | 1       | 1       | 1       | 2.62    | 1.11      | 2.11      | 2.23      |
| <i>IL28A/B</i> | 1       | 1       | 1.58    | 1       | 1       | 1       | 2.62    | 2.64      | 2.11      | 2.23      |
| <i>IL29</i>    | 1       | 1       | 1.58    | 1       | 1       | 1       | 2.62    | 1.11      | 2.11      | 2.23      |
| <i>IL2RA</i>   | 19.34   | 29.03   | 77.02   | 1       | 1       | 4.48    | 43.22   | 84.91     | 65        | 143.91    |
| <i>IL2RB</i>   | 163.04  | 675.67  | 127.71  | 306.91  | 421.04  | 200.6   | 19.65   | 567.4     | 662.9     | 157.27    |
| <i>IL2RG</i>   | 300.7   | 924.27  | 346.3   | 241.9   | 249.41  | 818.13  | 273.73  | 598.53    | 976.59    | 673.88    |
| <i>IL3</i>     | 1       | 1       | 1.58    | 1       | 1       | 1       | 2.62    | 1.11      | 2.11      | 2.23      |
|                |         |         | 222177. | 26948.8 |         | 63691.9 | 44517.9 |           |           |           |
| <i>IL32</i>    | 5890.69 | 7776.44 | 89      | 3       | 3534.38 | 5       | 5       | 127961.48 | 167778.34 | 325520.03 |
| <i>IL4</i>     | 1       | 1       | 1.58    | 1       | 1       | 1       | 2.62    | 1.11      | 2.11      | 2.23      |
| <i>IL4R</i>    | 242.42  | 65.36   | 181.57  | 23.98   | 42.12   | 91.06   | 27.5    | 259.45    | 258.69    | 375.49    |
| <i>IL5</i>     | 1       | 1       | 1.58    | 1       | 1       | 1       | 2.62    | 1         | 2.11      | 2.23      |
| <i>IL6</i>     | 1       | 1       | 1.58    | 1       | 1       | 1       | 2.62    | 1.11      | 2.11      | 2.23      |
| <i>IL6R</i>    | 108.78  | 1       | 64.35   | 1       | 1.06    | 35.1    | 2.62    | 5.98      | 2.11      | 88.24     |
| <i>IL6ST</i>   | 199.21  | 257.14  | 675.78  | 92.39   | 72.02   | 187.21  | 221.34  | 305.03    | 349.21    | 391.08    |
| <i>IL7</i>     | 1       | 5.81    | 1.58    | 1       | 1       | 1       | 2.62    | 1.11      | 2.11      | 2.23      |
| <i>IL7R</i>    | 121.84  | 80.11   | 172.06  | 171.22  | 233.2   | 95.85   | 1.31    | 460.68    | 881.85    | 141.68    |
| <i>IL8</i>     | 41.45   | 1       | 1852.7  | 1       | 1       | 80.54   | 11.79   | 409.54    | 6.05      | 261.92    |

|                |         |        |         |        |        |        |        |        |         |         |
|----------------|---------|--------|---------|--------|--------|--------|--------|--------|---------|---------|
| <i>IL9</i>     | 1       | 1      | 1.58    | 1      | 1      | 1      | 2.62   | 1.11   | 2.11    | 2.23    |
| <i>ILF3</i>    | 425.3   | 638.51 | 701.12  | 846.48 | 726.13 | 501.47 | 1256   | 768.63 | 818.69  | 408.89  |
| <i>IRAK1</i>   | 109.78  | 129.83 | 146.72  | 95.34  | 85.7   | 73.36  | 66.79  | 126.04 | 86.05   | 41.47   |
| <i>IRAK2</i>   | 36.43   | 16.73  | 265.52  | 1      | 1      | 7.35   | 3.93   | 24.88  | 2.11    | 10.3    |
| <i>IRAK3</i>   | 40.45   | 1      | 102.37  | 9.03   | 9.7    | 30.31  | 32.74  | 64.9   | 14.47   | 190.67  |
| <i>IRAK4</i>   | 45.47   | 87.22  | 45.34   | 35.08  | 38.88  | 72.89  | 35.36  | 77.13  | 109.21  | 123.86  |
| <i>IRF1</i>    | 579.05  | 450.01 | 1738.65 | 218.34 | 141.17 | 521.08 | 551.38 | 462.9  | 578.69  | 2170.27 |
| <i>IRF3</i>    | 3.27    | 31.49  | 1.58    | 15.83  | 17.09  | 15.96  | 6.55   | 10.42  | 10.26   | 41.47   |
| <i>IRF4</i>    | 78.63   | 245.12 | 134.05  | 128.41 | 94.89  | 63.8   | 2.62   | 879.8  | 488.16  | 72.65   |
| <i>IRF5</i>    | 123.85  | 14.82  | 145.14  | 5.86   | 11.32  | 56.62  | 2.62   | 12.65  | 2.11    | 150.59  |
| <i>IRF7</i>    | 31.4    | 38.59  | 110.29  | 19.68  | 18.35  | 44.19  | 35.36  | 33.77  | 18.68   | 348.77  |
| <i>IRF8</i>    | 396.16  | 35.58  | 219.58  | 67.93  | 31.49  | 135.07 | 386.36 | 38.22  | 22.89   | 45.93   |
| <i>IRGM</i>    | 2.26    | 1      | 1.58    | 7.45   | 12.58  | 1      | 19.65  | 1.11   | 2.11    | 2.23    |
| <i>ITGA2B</i>  | 39.44   | 1      | 1917.65 | 1      | 1      | 106.85 | 278.97 | 1.11   | 2.11    | 126.09  |
| <i>ITGA4</i>   | 206.25  | 874.28 | 111.87  | 244.62 | 188.54 | 357.49 | 412.55 | 720.82 | 846.06  | 132.77  |
| <i>ITGA5</i>   | 282.61  | 52.79  | 309.87  | 142.45 | 192.5  | 70.97  | 174.19 | 40.44  | 105     | 83.78   |
| <i>ITGA6</i>   | 4.27    | 69.19  | 1.58    | 13.11  | 24.29  | 52.32  | 360.17 | 28.21  | 107.11  | 5.85    |
| <i>ITGAE</i>   | 61.55   | 24.93  | 37.42   | 56.6   | 62.65  | 34.14  | 153.23 | 31.55  | 37.63   | 28.11   |
| <i>ITGAL</i>   | 485.59  | 442.91 | 225.92  | 37.8   | 13.48  | 596.66 | 72.03  | 383.97 | 591.32  | 442.29  |
| <i>ITGAM</i>   | 606.18  | 61.54  | 509.46  | 1      | 1      | 258.96 | 79.89  | 231.66 | 201.84  | 1945.36 |
| <i>ITGAX</i>   | 645.37  | 81.48  | 943.48  | 1      | 1      | 368.97 | 53.7   | 396.2  | 225     | 2290.51 |
| <i>ITGB1</i>   | 304.72  | 383.9  | 889.62  | 291.51 | 475.61 | 326.4  | 231.82 | 250.56 | 688.17  | 382.17  |
| <i>ITGB2</i>   | 1503.51 | 637.15 | 677.36  | 66.12  | 29.51  | 970.24 | 161.09 | 936.5  | 1229.22 | 1744.96 |
| <i>ITLN1</i>   | 1       | 1      | 2.57    | 1      | 1      | 1      | 2.62   | 1.11   | 2.11    | 2.23    |
| <i>ITLN2</i>   | 1       | 1      | 1.58    | 1      | 1      | 1      | 2.62   | 1.11   | 2.11    | 2.23    |
| <i>JAK1</i>    | 261.51  | 376.8  | 297.2   | 93.07  | 115.24 | 227.39 | 284.2  | 568.52 | 606.06  | 248.56  |
| <i>JAK2</i>    | 121.84  | 338.28 | 297.2   | 41.43  | 38.88  | 331.66 | 92.99  | 202.75 | 203.95  | 1090.28 |
| <i>JAK3</i>    | 125.86  | 293.48 | 167.31  | 56.15  | 29.87  | 229.3  | 140.14 | 296.14 | 353.42  | 932.18  |
| <i>KCNJ2</i>   | 8.29    | 1      | 50.09   | 1      | 1      | 7.35   | 2.62   | 1      | 2.11    | 248.56  |
| <i>KIR3DL1</i> | 1       | 1      | 1.58    | 1      | 1      | 1      | 2.62   | 1      | 2.11    | 2.23    |
| <i>KIR3DL2</i> | 1       | 1.16   | 1.58    | 1      | 1      | 1      | 82.51  | 10.42  | 2.11    | 5.85    |

|                                             |         |         |         |        |        |        |        |        |         |         |
|---------------------------------------------|---------|---------|---------|--------|--------|--------|--------|--------|---------|---------|
| <i>KIR3DL3</i>                              | 1       | 1       | 1.58    | 1      | 1      | 1      | 2.62   | 1.11   | 2.11    | 2.23    |
| <i>KIR_Activating</i><br><i>_Subgroup_1</i> | 12.31   | 2.8     | 1.58    | 1      | 1.06   | 17.88  | 2.62   | 53.78  | 31.32   | 39.25   |
| <i>KIR_Activating</i><br><i>_Subgroup_2</i> | 2.26    | 1       | 1.58    | 1      | 1      | 7.83   | 2.62   | 34.88  | 31.32   | 37.02   |
| <i>KIR_Inhibiting</i><br><i>_Subgroup_1</i> | 30.4    | 33.67   | 1.58    | 1      | 1      | 21.7   | 53.7   | 101.59 | 52.37   | 2.23    |
| <i>KIR_Inhibiting</i><br><i>_Subgroup_2</i> | 13.31   | 31.49   | 1.58    | 1      | 1      | 18.83  | 85.13  | 133.83 | 75.53   | 1.39    |
| <i>KIT</i>                                  | 1       | 1       | 1.58    | 1      | 1      | 1      | 2.62   | 1.11   | 2.11    | 2.23    |
| <i>KLRAP1</i>                               | 3.27    | 2.8     | 1.58    | 1      | 3.76   | 1      | 1.31   | 1.11   | 2.11    | 2.23    |
| <i>KLRB1</i>                                | 148.97  | 1.71    | 64.35   | 1.33   | 1      | 50.88  | 1.31   | 21.54  | 14.47   | 45.93   |
| <i>KLRC1</i>                                | 41.45   | 725.39  | 1.58    | 1      | 1      | 130.76 | 2.62   | 198.31 | 212.37  | 45.93   |
| <i>KLRC2</i>                                | 63.56   | 1153.21 | 1.58    | 1      | 1      | 189.12 | 2.62   | 308.37 | 393.43  | 126.09  |
| <i>KLRC3</i>                                | 37.43   | 99.78   | 1.58    | 1      | 1      | 44.66  | 2.62   | 128.27 | 166.05  | 37.02   |
| <i>KLRC4</i>                                | 66.57   | 185.29  | 43.76   | 6.31   | 1.24   | 92.98  | 17.03  | 136.05 | 250.27  | 90.46   |
| <i>KLRD1</i>                                | 94.71   | 614.75  | 1.58    | 1      | 1      | 238.87 | 9.17   | 296.14 | 496.58  | 94.92   |
| <i>KLRF1</i>                                | 77.62   | 1       | 1.58    | 2.46   | 3.4    | 46.58  | 2.62   | 7.09   | 2.11    | 3.62    |
| <i>KLRF2</i>                                | 1       | 1       | 1.58    | 77.22  | 56.89  | 1      | 134.9  | 1.11   | 2.11    | 2.23    |
| <i>KLRG1</i>                                | 7.29    | 129.01  | 1.58    | 1      | 1      | 20.27  | 2.62   | 1.11   | 2.11    | 2.23    |
| <i>KLRG2</i>                                | 1       | 1       | 1.58    | 1.56   | 1.6    | 4.48   | 1.31   | 1.11   | 2.11    | 3.62    |
| <i>KLRK1</i>                                | 241.42  | 1503.44 | 213.25  | 230.8  | 323.25 | 734.9  | 45.84  | 896.48 | 1496.59 | 469.01  |
| <i>LAG3</i>                                 | 46.47   | 790.96  | 72.27   | 70.42  | 10.06  | 478.51 | 14.41  | 433.99 | 593.43  | 166.17  |
| <i>LAIR1</i>                                | 228.35  | 36.13   | 262.35  | 255.71 | 282.19 | 97.76  | 525.19 | 77.13  | 77.63   | 814.16  |
| <i>LAMP3</i>                                | 1       | 1.71    | 1.58    | 1      | 1      | 4.01   | 2.62   | 1      | 2.11    | 2.23    |
| <i>LCK</i>                                  | 145.95  | 620.48  | 148.3   | 45.28  | 14.03  | 455.07 | 32.74  | 409.54 | 587.11  | 190.67  |
| <i>LCP2</i>                                 | 919.69  | 510.39  | 2285.14 | 156.5  | 168.19 | 698.54 | 443.99 | 708.59 | 654.48  | 1635.84 |
| <i>LEF1</i>                                 | 12.31   | 3.62    | 40.59   | 385.74 | 615.37 | 66.67  | 810.7  | 17.09  | 12.37   | 23.66   |
| <i>LGALS3</i>                               | 1219.14 | 138.3   | 2004.77 | 1.56   | 1      | 246.52 | 19.65  | 381.74 | 370.27  | 422.25  |
| <i>LIF</i>                                  | 28.39   | 21.38   | 77.02   | 25.34  | 14.93  | 28.88  | 30.12  | 41.55  | 6.05    | 61.51   |
| <i>LILRA1</i>                               | 88.68   | 1       | 1.58    | 1      | 1      | 26.97  | 2.62   | 1.11   | 2.11    | 14.75   |

|                 |        |        |         |        |        |        |        |        |        |         |
|-----------------|--------|--------|---------|--------|--------|--------|--------|--------|--------|---------|
| <i>LILRA2</i>   | 197.2  | 1      | 83.36   | 19     | 21.41  | 60.93  | 77.27  | 1.53   | 1.84   | 99.37   |
| <i>LILRA3</i>   | 161.03 | 1.98   | 27.92   | 2.24   | 1      | 75.28  | 19.65  | 22.65  | 35.53  | 88.24   |
| <i>LILRA4</i>   | 6.28   | 1      | 1.58    | 1      | 1      | 1      | 2.62   | 1.11   | 2.11   | 2.23    |
| <i>LILRA5</i>   | 483.58 | 1.71   | 534.8   | 1.1    | 1      | 204.91 | 113.94 | 278.35 | 159.74 | 2096.79 |
| <i>LILRA6</i>   | 208.26 | 20.28  | 194.24  | 11.3   | 11.14  | 106.37 | 40.6   | 97.14  | 83.95  | 284.19  |
| <i>LILRB1</i>   | 668.48 | 19.74  | 235.42  | 10.84  | 4.66   | 130.76 | 17.03  | 11.53  | 2.11   | 77.1    |
| <i>LILRB2</i>   | 839.3  | 6.08   | 333.63  | 47.77  | 43.38  | 312.53 | 145.38 | 73.79  | 18.68  | 767.4   |
| <i>LILRB3</i>   | 167.06 | 1      | 428.67  | 1      | 1      | 120.72 | 37.98  | 159.4  | 54.47  | 1417.62 |
| <i>LILRB4</i>   | 187.15 | 1      | 233.84  | 1.1    | 9.16   | 58.54  | 2.62   | 1.11   | 2.11   | 90.46   |
| <i>LILRB5</i>   | 1      | 1      | 1.58    | 1      | 1      | 1      | 2.62   | 1.11   | 2.11   | 2.23    |
| <i>LITAF</i>    | 646.37 | 360.41 | 1249.19 | 42.78  | 27.17  | 320.66 | 163.71 | 949.84 | 982.91 | 1390.9  |
| <i>LTA</i>      | 18.34  | 14.82  | 18.41   | 16.51  | 16.91  | 22.66  | 19.65  | 32.66  | 20.79  | 21.43   |
| <i>LTB4R</i>    | 32.41  | 34.49  | 43.76   | 16.51  | 13.12  | 29.84  | 48.46  | 106.03 | 71.32  | 212.94  |
| <i>LTB4R2</i>   | 9.29   | 21.38  | 15.25   | 15.38  | 9.34   | 13.57  | 30.12  | 62.67  | 54.47  | 74.88   |
| <i>LTBR</i>     | 167.06 | 1      | 224.34  | 21.94  | 21.59  | 96.8   | 22.26  | 28.21  | 3.95   | 146.13  |
| <i>LTF</i>      | 1      | 1      | 102.37  | 1      | 1      | 1      | 6.55   | 1.11   | 2.11   | 108.28  |
| <i>LY96</i>     | 168.06 | 1      | 138.8   | 10.62  | 4.12   | 119.28 | 17.03  | 37.1   | 22.89  | 477.92  |
| <i>MAF</i>      | 1      | 5.26   | 1.58    | 1      | 1      | 7.83   | 3.93   | 7.09   | 22.89  | 2.23    |
| <i>MALT1</i>    | 296.68 | 83.66  | 244.93  | 48.9   | 50.58  | 128.85 | 58.94  | 245    | 292.37 | 81.56   |
| <i>MAP4K1</i>   | 60.54  | 247.03 | 39.01   | 76.08  | 62.11  | 158.03 | 150.62 | 341.72 | 378.69 | 70.42   |
| <i>MAP4K2</i>   | 32.41  | 61.81  | 97.61   | 43.01  | 45.72  | 46.1   | 142.76 | 80.46  | 90.26  | 79.33   |
| <i>MAP4K4</i>   | 305.73 | 131.2  | 474.61  | 306    | 374.94 | 258.48 | 514.71 | 153.84 | 237.63 | 246.34  |
| <i>MAPK1</i>    | 287.64 | 254.68 | 563.31  | 171.45 | 194.66 | 331.18 | 286.82 | 209.42 | 378.69 | 357.68  |
| <i>MAPK11</i>   | 3.27   | 5.26   | 7.33    | 2.24   | 3.4    | 7.83   | 9.17   | 8.2    | 14.47  | 37.02   |
| <i>MAPK14</i>   | 192.18 | 187.75 | 602.92  | 100.32 | 102.09 | 215.91 | 286.82 | 329.49 | 334.48 | 2430.8  |
| <i>MAPKAPK2</i> | 455.45 | 317.79 | 971.99  | 63.85  | 86.96  | 181.47 | 305.16 | 634.11 | 555.53 | 431.16  |
| <i>MARCO</i>    | 44.46  | 1      | 1       | 1      | 1      | 47.06  | 2.62   | 1.11   | 2.11   | 2.23    |
| <i>MASP1</i>    | 1      | 1      | 1.58    | 1      | 1      | 1      | 2.62   | 1.11   | 2.11   | 2.23    |
| <i>MASP2</i>    | 1      | 1      | 1.58    | 1      | 1      | 1      | 2.62   | 1.11   | 2.11   | 2.23    |
| <i>MBL2</i>     | 1      | 1      | 1.58    | 1      | 1      | 1      | 2.62   | 1.11   | 2.11   | 2.23    |
| <i>MBP</i>      | 130.88 | 101.7  | 154.64  | 32.82  | 36     | 74.32  | 6.55   | 61.56  | 43.95  | 119.41  |

|               |        |         |         |        |        |         |         |         |         |         |
|---------------|--------|---------|---------|--------|--------|---------|---------|---------|---------|---------|
| <i>MCL1</i>   | 2144.6 | 1508.35 | 2978.94 | 649.41 | 628.88 | 1901.55 | 1827.03 | 1664.69 | 1985.02 | 6178.46 |
| <i>MIF</i>    | 87.67  | 190.48  | 116.62  | 280.86 | 291.73 | 99.19   | 260.63  | 132.71  | 151.32  | 45.93   |
| <i>MME</i>    | 1      | 1       | 1       | 413.15 | 704.88 | 1       | 2172.79 | 1.11    | 2.11    | 2.23    |
| <i>MRI</i>    | 17.33  | 13.18   | 20      | 4.73   | 6.46   | 16.44   | 11.79   | 12.65   | 1.84    | 8.07    |
| <i>MRC1</i>   | 22.36  | 1       | 227.5   | 11.98  | 16.73  | 2.57    | 35.36   | 1.11    | 2.11    | 219.62  |
| <i>MS4A1</i>  | 1      | 1       | 1.58    | 674.1  | 383.4  | 1       | 341.83  | 1.11    | 2.11    | 2.23    |
| <i>MSR1</i>   | 16.33  | 1       | 56.43   | 1      | 1      | 16.44   | 51.08   | 1.11    | 2.11    | 2.23    |
| <i>MUC1</i>   | 1      | 17.28   | 2.57    | 1      | 1      | 4.01    | 2.62    | 4.86    | 2.11    | 8.07    |
| <i>MX1</i>    | 523.78 | 460.12  | 715.38  | 245.29 | 163.69 | 390.98  | 234.44  | 378.41  | 452.37  | 1854.07 |
| <i>MYD88</i>  | 337.88 | 194.85  | 349.47  | 105.08 | 96.51  | 330.71  | 119.18  | 144.94  | 235.53  | 575.9   |
| <i>NCAM1</i>  | 21.35  | 54.16   | 29.5    | 2.69   | 2.14   | 52.8    | 56.32   | 98.25   | 145     | 52.61   |
| <i>NCF4</i>   | 160.02 | 63.72   | 219.58  | 172.81 | 144.78 | 73.84   | 244.91  | 220.54  | 231.32  | 716.19  |
| <i>NCR1</i>   | 16.33  | 25.2    | 1.58    | 1      | 1      | 16.92   | 2.62    | 14.87   | 8.16    | 5.85    |
| <i>NEG_A</i>  | 1      | 6.25    | 10.62   | 5.88   | 7.88   | 1       | 1.5     | 1       | 1       | 5.62    |
| <i>NEG_B</i>  | 1      | 1       | 1       | 2.88   | 1      | 1       | 1.5     | 1       | 1       | 1.62    |
| <i>NEG_C</i>  | 1      | 3.25    | 1       | 1      | 1      | 3.38    | 1       | 1       | 1       | 1.62    |
| <i>NEG_D</i>  | 1      | 1       | 1       | 1      | 1      | 1       | 1       | 1       | 1       | 1       |
| <i>NEG_E</i>  | 9.25   | 1.25    | 2.62    | 6.88   | 5.88   | 4.38    | 2.5     | 3.38    | 9.88    | 5.62    |
| <i>NEG_F</i>  | 8.25   | 8.25    | 15.62   | 2.88   | 4.88   | 9.38    | 3.5     | 12.38   | 5.88    | 1       |
| <i>NEG_G</i>  | 1      | 1       | 1       | 1      | 1      | 1       | 1       | 1       | 1       | 1       |
| <i>NEG_H</i>  | 2.25   | 1       | 1       | 1      | 1      | 1       | 1       | 1       | 1       | 1       |
| <i>NFATC1</i> | 81.64  | 66.73   | 72.27   | 18.32  | 18.71  | 62.36   | 14.41   | 101.59  | 121.84  | 90.46   |
| <i>NFATC2</i> | 73.61  | 309.87  | 99.2    | 27.61  | 27.71  | 277.61  | 27.5    | 411.76  | 345     | 117.18  |
| <i>NFATC3</i> | 97.72  | 335     | 65.93   | 141.55 | 180.43 | 240.78  | 98.23   | 168.29  | 330.27  | 117.18  |
| <i>NFIL3</i>  | 42.45  | 26.29   | 43.76   | 47.77  | 86.96  | 87.71   | 72.03   | 183.85  | 113.42  | 322.05  |
| <i>NFKB1</i>  | 87.67  | 32.58   | 92.86   | 29.42  | 30.05  | 50.88   | 100.85  | 102.7   | 109.21  | 37.02   |
| <i>NFKB2</i>  | 181.12 | 65.09   | 518.96  | 41.88  | 37.98  | 178.6   | 179.43  | 671.91  | 427.11  | 1143.73 |
| <i>NFKBIA</i> | 862.41 | 1107.58 | 2727.08 | 384.61 | 337.48 | 1967.08 | 2290.66 | 1416.77 | 1416.59 | 10781.2 |
| <i>NFKBIZ</i> | 98.73  | 157.7   | 449.27  | 46.64  | 45.18  | 313.01  | 195.14  | 272.79  | 233.42  | 1063.56 |
| <i>NLRP3</i>  | 163.04 | 1       | 330.46  | 23.08  | 26.09  | 53.27   | 24.88   | 23.76   | 2.11    | 159.49  |
| <i>NOD1</i>   | 16.33  | 37.77   | 18.41   | 24.66  | 31.49  | 41.79   | 64.18   | 11.53   | 37.63   | 48.15   |

|                 |         |         |         |         |         |         |         |          |          |          |
|-----------------|---------|---------|---------|---------|---------|---------|---------|----------|----------|----------|
| <i>NOD2</i>     | 302.71  | 8.54    | 425.51  | 2.24    | 3.76    | 76.23   | 14.41   | 43.77    | 27.11    | 351      |
| <i>NOS2</i>     | 1       | 1       | 1.58    | 1       | 1       | 1       | 2.62    | 1.11     | 2.11     | 2.23     |
| <i>NOTCH1</i>   | 110.78  | 67.27   | 91.28   | 12.43   | 17.45   | 50.4    | 3.93    | 77.13    | 52.37    | 112.73   |
| <i>NOTCH2</i>   | 220.31  | 77.93   | 107.12  | 18.09   | 24.29   | 148.94  | 30.12   | 32.66    | 58.68    | 126.09   |
| <i>NT5E</i>     | 1.26    | 1       | 12.08   | 153.1   | 232.12  | 3.05    | 43.22   | 7.09     | 2.11     | 23.66    |
| <i>OAZ1</i>     | 2058.19 | 651.9   | 7740.48 | 865.74  | 804.29  | 1471.53 | 1719.63 | 695.25   | 976.59   | 1869.65  |
| <i>PAX5</i>     | 1       | 1       | 1.58    | 289.69  | 297.86  | 1       | 203     | 4.86     | 2.11     | 5.85     |
| <i>PDCD1</i>    | 8.29    | 82.03   | 1.58    | 2.46    | 1       | 24.1    | 2.62    | 189.41   | 151.32   | 2.23     |
| <i>PDCD1LG2</i> | 1       | 1.71    | 1.58    | 1       | 1       | 7.35    | 2.62    | 2.64     | 2.11     | 2.23     |
| <i>PDCD2</i>    | 25.37   | 27.11   | 4.16    | 19      | 14.93   | 14.53   | 19.65   | 20.43    | 10.26    | 23.66    |
| <i>PDGFB</i>    | 1       | 1       | 1.58    | 1       | 1       | 1       | 2.62    | 1.11     | 2.11     | 2.23     |
| <i>PDGFRB</i>   | 1       | 7.99    | 1.58    | 127.28  | 102.45  | 27.92   | 1.31    | 8.2      | 2.11     | 19.21    |
| <i>PECAM1</i>   | 809.16  | 76.83   | 379.57  | 36.89   | 31.67   | 324.01  | 244.91  | 77.13    | 138.69   | 288.65   |
| <i>PIGR</i>     | 1       | 1       | 1.58    | 1       | 1       | 1       | 2.62    | 1.11     | 2.11     | 2.23     |
| <i>PLA2G2A</i>  | 1       | 1       | 1.58    | 1       | 1       | 1       | 2.62    | 1.11     | 2.11     | 2.23     |
| <i>PLA2G2E</i>  | 1       | 1       | 1.58    | 1       | 1       | 1       | 2.62    | 1.11     | 2.11     | 3.62     |
| <i>PLAU</i>     | 40.45   | 1       | 91.28   | 3.82    | 10.42   | 1       | 43.22   | 1        | 2.11     | 43.7     |
| <i>PLAUR</i>    | 93.7    | 1       | 198.99  | 3.6     | 3.58    | 65.71   | 2.62    | 100.47   | 2.11     | 139.45   |
| <i>PML</i>      | 112.79  | 162.89  | 701.12  | 83.78   | 75.26   | 161.86  | 184.67  | 222.76   | 172.37   | 1210.53  |
| <i>POLR1B</i>   | 6.28    | 26.84   | 1.58    | 28.51   | 27.35   | 21.7    | 2.62    | 17.09    | 14.47    | 2.23     |
| <i>POLR2A</i>   | 81.64   | 175.46  | 219.58  | 122.29  | 98.13   | 127.89  | 182.05  | 198.31   | 208.16   | 540.27   |
| <i>POS_A</i>    | 13734.2 | 21673.2 | 58556.6 | 44275.8 | 19784.8 | 33066.3 |         |          |          |          |
|                 | 5       | 5       | 2       | 8       | 8       | 8       | 29061.5 | 46725.38 | 46043.88 | 45696.62 |
|                 |         |         | 18339.6 | 14606.8 |         | 10481.3 |         |          |          |          |
| <i>POS_B</i>    | 4221.25 | 7882.25 | 2       | 8       | 6308.88 | 8       | 8010.5  | 14851.38 | 13760.88 | 14971.62 |
| <i>POS_C</i>    | 1514.25 | 2359.25 | 5671.62 | 4510.88 | 2070.88 | 3234.38 | 3299.5  | 4828.38  | 4576.88  | 4900.62  |
| <i>POS_D</i>    | 298.25  | 491.25  | 1184.62 | 922.88  | 423.88  | 695.38  | 852.5   | 944.38   | 917.88   | 986.62   |
| <i>POS_E</i>    | 54.25   | 83.25   | 210.62  | 167.88  | 77.88   | 118.38  | 116.5   | 192.38   | 155.88   | 187.62   |
| <i>POS_F</i>    | 27.25   | 42.25   | 96.62   | 62.88   | 41.88   | 55.38   | 48.5    | 66.38    | 73.88    | 86.62    |
| <i>POU2F2</i>   | 139.93  | 25.75   | 43.76   | 39.39   | 37.08   | 104.93  | 30.12   | 24.88    | 22.89    | 68.19    |
| <i>PPARG</i>    | 5.28    | 2.25    | 1.58    | 1       | 1       | 1       | 2.62    | 1.11     | 2.11     | 2.23     |



|                  |         |         |         |         |        |         |         |         |         |         |
|------------------|---------|---------|---------|---------|--------|---------|---------|---------|---------|---------|
|                  |         |         | 11321.9 |         |        |         |         |         |         |         |
| <i>PPBP</i>      | 395.16  | 3.35    | 3       | 2.01    | 1      | 670.32  | 1200.99 | 64.9    | 212.37  | 2753.68 |
| <i>PPIA</i>      | 62.55   | 47.6    | 35.84   | 83.56   | 76.34  | 44.19   | 116.56  | 48.22   | 69.21   | 37.02   |
| <i>PRDM1</i>     | 81.64   | 529.51  | 143.55  | 19.91   | 6.46   | 220.69  | 24.88   | 521.82  | 730.27  | 241.88  |
| <i>PRF1</i>      | 622.25  | 4702.22 | 149.89  | 168.28  | 19.07  | 2208.64 | 168.95  | 3132.18 | 4353.47 | 1549    |
| <i>PRKCD</i>     | 145.95  | 58.8    | 474.61  | 32.14   | 34.92  | 169.51  | 74.65   | 149.39  | 94.47   | 1074.7  |
| <i>PSMB10</i>    | 282.61  | 512.3   | 352.64  | 164.2   | 142.79 | 412.98  | 192.53  | 270.57  | 326.06  | 473.47  |
| <i>PSMB5</i>     | 76.62   | 33.94   | 53.26   | 160.8   | 164.95 | 83.41   | 98.23   | 31.55   | 50.26   | 41.47   |
| <i>PSMB7</i>     | 455.45  | 241.3   | 604.5   | 197.5   | 192.5  | 331.66  | 635.2   | 407.31  | 458.69  | 330.95  |
| <i>PSMB8</i>     | 524.78  | 1232.16 | 853.19  | 707.17  | 672.46 | 1112.3  | 1145.99 | 594.09  | 926.06  | 1025.71 |
| <i>PSMB9</i>     | 326.83  | 747.24  | 373.23  | 366.71  | 290.11 | 818.6   | 614.25  | 370.63  | 475.53  | 1007.89 |
| <i>PSMC2</i>     | 236.39  | 198.68  | 292.45  | 123.88  | 115.06 | 242.22  | 113.94  | 221.65  | 189.21  | 148.36  |
| <i>PSMD7</i>     | 434.35  | 296.75  | 583.91  | 256.17  | 274.27 | 357.49  | 373.26  | 455.12  | 467.11  | 573.67  |
| <i>PTAFR</i>     | 218.3   | 1       | 373.23  | 1       | 1      | 52.8    | 2.62    | 28.21   | 16.58   | 673.88  |
| <i>PTGER4</i>    | 45.47   | 29.3    | 75.44   | 58.19   | 74.36  | 54.71   | 24.88   | 74.9    | 77.63   | 70.42   |
| <i>PTGS2</i>     | 6.28    | 1       | 1.58    | 1       | 1      | 5.92    | 2.62    | 1.11    | 2.11    | 2.23    |
| <i>PTK2</i>      | 41.45   | 1       | 153.06  | 147.21  | 158.46 | 23.62   | 85.13   | 1.11    | 2.11    | 92.69   |
| <i>PTPN2</i>     | 120.83  | 118.36  | 127.71  | 61.13   | 49.5   | 87.71   | 56.32   | 149.39  | 130.26  | 177.31  |
| <i>PTPN22</i>    | 82.65   | 173     | 96.03   | 30.78   | 13.3   | 185.29  | 37.98   | 257.23  | 277.63  | 101.6   |
| <i>PTPN6</i>     | 531.82  | 328.72  | 580.74  | 405.67  | 458.32 | 556.96  | 292.06  | 303.92  | 286.06  | 1992.13 |
| <i>PTPRC_all</i> | 1415.08 | 2290.5  | 2196.43 | 120.03  | 30.77  | 2529.12 | 878.81  | 2827.57 | 3212.4  | 6287.57 |
| <i>PYCARD</i>    | 45.47   | 22.2    | 24.75   | 10.17   | 13.3   | 38.92   | 3.93    | 15.98   | 3.95    | 50.38   |
| <i>RAF1</i>      | 192.18  | 134.48  | 306.7   | 105.53  | 96.69  | 152.77  | 200.38  | 218.32  | 197.63  | 462.33  |
| <i>RAG1</i>      | 1       | 1       | 1.58    | 146.3   | 176.83 | 1       | 289.44  | 1.11    | 2.11    | 2.23    |
| <i>RAG2</i>      | 1       | 1       | 1.58    | 121.61  | 159.18 | 1       | 475.42  | 1.11    | 2.11    | 2.23    |
| <i>RARRES3</i>   | 248.45  | 467.77  | 319.38  | 61.36   | 36.54  | 645.93  | 87.75   | 212.76  | 429.22  | 415.57  |
| <i>RELA</i>      | 123.85  | 54.43   | 194.24  | 57.06   | 60.31  | 54.71   | 64.18   | 121.6   | 132.37  | 99.37   |
| <i>RELB</i>      | 171.08  | 13.45   | 167.31  | 16.73   | 14.39  | 44.19   | 66.79   | 237.22  | 142.9   | 101.6   |
| <i>RORC</i>      | 8.29    | 1       | 1.58    | 1       | 2.68   | 12.62   | 11.79   | 5.98    | 2.11    | 2.23    |
|                  |         |         |         |         |        |         | 11450.6 |         |         |         |
| <i>RPL19</i>     | 4006.59 | 3621.21 | 4173.28 | 5789.65 | 4964.9 | 2908.91 | 9       | 3530.19 | 4214.52 | 2237.07 |

|                 |         |        |         |        |        |         |         |         |         |          |
|-----------------|---------|--------|---------|--------|--------|---------|---------|---------|---------|----------|
| <i>RUNX1</i>    | 174.09  | 23.02  | 165.73  | 91.94  | 107.86 | 46.1    | 87.75   | 25.99   | 20.79   | 148.36   |
| <i>SI00A8</i>   | 8114.42 | 47.88  | 9457.55 | 2.46   | 1      | 6183.57 | 1620.1  | 3641.36 | 1370.28 | 40366.11 |
|                 | 10464.7 |        | 15760.3 |        |        |         |         |         |         |          |
| <i>SI00A9</i>   | 7       | 39.68  | 4       | 1      | 1      | 6338.07 | 1882.04 | 3342.3  | 1018.69 | 34433.99 |
| <i>SIPRI</i>    | 8.29    | 19.46  | 40.59   | 1      | 1      | 15.96   | 2.62    | 20.43   | 37.63   | 52.61    |
| <i>sCTLA4</i>   | 16.33   | 102.24 | 48.51   | 6.31   | 4.66   | 59.97   | 2.62    | 90.47   | 75.53   | 50.38    |
| <i>SDHA</i>     | 43.46   | 70.55  | 54.85   | 51.39  | 64.81  | 30.79   | 37.98   | 63.79   | 94.47   | 57.06    |
| <i>SELE</i>     | 1       | 1      | 1.58    | 1      | 1      | 1       | 2.62    | 1.11    | 2.11    | 2.23     |
| <i>SELL</i>     | 535.84  | 302.22 | 595     | 60.91  | 77.24  | 499.08  | 155.85  | 330.6   | 370.27  | 1885.24  |
| <i>SELPLG</i>   | 16.33   | 27.93  | 1.58    | 1      | 1      | 17.4    | 1.31    | 13.76   | 31.32   | 94.92    |
| <i>SERPING1</i> | 48.48   | 1      | 173.65  | 1      | 1      | 117.85  | 11.79   | 18.2    | 8.16    | 273.06   |
| <i>SH2D1A</i>   | 81.64   | 169.45 | 84.94   | 15.38  | 1      | 196.77  | 3.93    | 212.76  | 212.37  | 30.34    |
| <i>SIGIRR</i>   | 88.68   | 151.69 | 51.68   | 46.86  | 58.69  | 136.03  | 56.32   | 174.96  | 309.21  | 90.46    |
| <i>SKI</i>      | 235.39  | 95.96  | 358.98  | 22.17  | 39.06  | 69.06   | 58.94   | 356.17  | 467.11  | 99.37    |
| <i>SLAMF1</i>   | 8.29    | 83.39  | 5.74    | 1      | 1      | 38.45   | 2.62    | 100.47  | 86.05   | 94.92    |
| <i>SLAMF6</i>   | 3.27    | 69.46  | 1.58    | 1.33   | 1      | 48.97   | 1.31    | 15.98   | 33.42   | 8.07     |
| <i>SLAMF7</i>   | 50.49   | 102.24 | 67.52   | 8.35   | 1.42   | 240.3   | 2.62    | 198.31  | 111.32  | 63.74    |
| <i>SLC2A1</i>   | 2.26    | 3.35   | 31.09   | 2.69   | 5.02   | 2.57    | 2.62    | 4.86    | 2.11    | 1.39     |
| <i>SMAD3</i>    | 215.29  | 134.48 | 178.4   | 10.17  | 16.55  | 90.11   | 30.12   | 104.92  | 147.11  | 21.43    |
| <i>SMAD5</i>    | 51.5    | 24.38  | 23.17   | 31.46  | 39.42  | 19.79   | 64.18   | 46      | 39.74   | 10.3     |
| <i>SOCS1</i>    | 41.45   | 26.57  | 604.5   | 16.05  | 32.03  | 41.32   | 318.26  | 120.48  | 126.05  | 362.13   |
| <i>SOCS3</i>    | 123.85  | 23.84  | 926.05  | 3.14   | 12.58  | 295.31  | 323.5   | 746.39  | 208.16  | 4176.59  |
| <i>SPP1</i>     | 1       | 1      | 1.58    | 1      | 1      | 1       | 2.62    | 1.11    | 2.11    | 2.23     |
| <i>SRC</i>      | 263.52  | 1      | 200.58  | 10.17  | 15.29  | 41.32   | 1.31    | 8.2     | 2.11    | 59.29    |
| <i>STAT1</i>    | 331.85  | 849.96 | 1177.91 | 148.8  | 56.35  | 794.69  | 153.23  | 245     | 271.32  | 1540.09  |
| <i>STAT2</i>    | 200.22  | 259.33 | 542.72  | 140.87 | 103.89 | 405.33  | 163.71  | 189.41  | 235.53  | 774.08   |
| <i>STAT3</i>    | 453.44  | 358.49 | 1200.09 | 95.56  | 83.72  | 412.5   | 263.25  | 485.13  | 547.11  | 1219.44  |
| <i>STAT4</i>    | 94.71   | 278.45 | 140.38  | 9.26   | 6.82   | 161.86  | 106.09  | 480.69  | 435.53  | 589.26   |
| <i>STAT5A</i>   | 127.87  | 90.49  | 232.26  | 22.17  | 21.77  | 121.68  | 166.33  | 103.81  | 117.63  | 117.18   |
| <i>STAT5B</i>   | 145.95  | 161.52 | 157.81  | 48.67  | 67.87  | 163.77  | 85.13   | 191.64  | 279.74  | 366.58   |
| <i>STAT6</i>    | 312.76  | 229.28 | 408.08  | 240.08 | 243.47 | 450.77  | 326.11  | 292.8   | 349.21  | 1562.36  |

|                |         |        |         |        |        |        |        |         |         |         |
|----------------|---------|--------|---------|--------|--------|--------|--------|---------|---------|---------|
| <i>SYK</i>     | 270.56  | 1      | 179.98  | 118.44 | 159.36 | 117.85 | 226.58 | 13.76   | 2.11    | 246.34  |
| <i>TAGAP</i>   | 199.21  | 219.71 | 379.57  | 66.8   | 90.57  | 250.83 | 247.53 | 295.03  | 250.27  | 898.78  |
| <i>TALI</i>    | 3.27    | 1      | 181.57  | 1      | 1      | 6.88   | 1.31   | 1.11    | 2.11    | 2.23    |
| <i>TAPI</i>    | 106.77  | 401.93 | 669.44  | 126.6  | 87.86  | 318.75 | 153.23 | 187.19  | 235.53  | 985.63  |
| <i>TAP2</i>    | 43.46   | 148.68 | 160.98  | 35.31  | 32.94  | 90.58  | 40.6   | 54.89   | 79.74   | 460.11  |
| <i>TAPBP</i>   | 292.66  | 383.35 | 1215.93 | 132.71 | 122.62 | 348.88 | 362.79 | 397.31  | 456.58  | 2330.6  |
| <i>TBK1</i>    | 187.15  | 186.93 | 265.52  | 41.65  | 45.72  | 133.16 | 61.56  | 221.65  | 176.58  | 226.3   |
| <i>TBP</i>     | 94.71   | 70.55  | 39.01   | 60.23  | 71.3   | 67.15  | 64.18  | 92.69   | 111.32  | 108.28  |
| <i>TBX21</i>   | 62.55   | 431.16 | 10.49   | 65.66  | 45.54  | 272.83 | 2.62   | 136.05  | 193.42  | 61.51   |
| <i>TCF4</i>    | 7.29    | 1      | 1.58    | 186.63 | 173.77 | 5.44   | 171.57 | 1.11    | 2.11    | 28.11   |
| <i>TCF7</i>    | 109.78  | 11     | 146.72  | 11.3   | 12.22  | 88.19  | 2.62   | 166.07  | 161.84  | 43.7    |
| <i>TFRC</i>    | 81.64   | 190.21 | 347.89  | 51.85  | 66.61  | 136.03 | 268.49 | 164.95  | 248.16  | 406.66  |
| <i>TGFB1</i>   | 1011.13 | 830.29 | 2652.63 | 146.76 | 163.15 | 549.78 | 423.03 | 1343.4  | 1395.54 | 2947.41 |
| <i>TGFB1</i>   | 672.5   | 1      | 208.5   | 1      | 1      | 163.29 | 2.62   | 1.11    | 2.11    | 2.23    |
| <i>TGFBR1</i>  | 53.51   | 25.2   | 96.03   | 4.5    | 3.94   | 29.36  | 6.55   | 17.09   | 33.42   | 117.18  |
| <i>TGFBR2</i>  | 322.81  | 174.36 | 256.02  | 112.33 | 108.76 | 198.69 | 98.23  | 132.71  | 201.84  | 339.86  |
| <i>THY1</i>    | 1       | 1      | 1.58    | 1      | 1      | 1      | 2.62   | 1.11    | 2.11    | 2.23    |
| <i>TICAM1</i>  | 34.42   | 21.1   | 80.19   | 13.11  | 15.11  | 56.14  | 85.13  | 37.1    | 37.63   | 83.78   |
| <i>TIGIT</i>   | 83.65   | 25.75  | 61.18   | 14.47  | 2.68   | 77.67  | 2.62   | 51.56   | 92.37   | 37.02   |
| <i>TIRAP</i>   | 1       | 5.26   | 1.58    | 1      | 1      | 4.01   | 2.62   | 1       | 2.11    | 1.39    |
| <i>TLR1</i>    | 466.5   | 13.45  | 229.09  | 34.4   | 20.87  | 79.1   | 90.37  | 47.11   | 75.53   | 785.22  |
| <i>TLR2</i>    | 310.75  | 5.81   | 661.52  | 11.75  | 9.16   | 159.94 | 40.6   | 168.29  | 100.79  | 1909.74 |
| <i>TLR3</i>    | 1       | 1.16   | 1.58    | 6.31   | 10.78  | 4.96   | 2.62   | 1.11    | 2.11    | 2.23    |
| <i>TLR4</i>    | 279.6   | 1      | 346.3   | 9.26   | 2.68   | 91.54  | 703.31 | 67.12   | 298.69  | 551.4   |
| <i>TLR5</i>    | 12.31   | 1      | 1.58    | 1      | 1      | 12.14  | 2.62   | 4.86    | 2.11    | 37.02   |
| <i>TLR7</i>    | 44.46   | 1      | 1       | 12.2   | 11.32  | 11.18  | 2.62   | 1.53    | 2.11    | 2.23    |
| <i>TLR8</i>    | 213.28  | 1      | 129.3   | 1      | 1      | 107.8  | 1.31   | 8.2     | 1.84    | 90.46   |
| <i>TLR9</i>    | 3.27    | 1      | 1.58    | 6.99   | 6.1    | 1      | 2.62   | 5.98    | 2.11    | 5.85    |
| <i>TMEM173</i> | 190.17  | 246.21 | 267.1   | 10.84  | 8.98   | 217.82 | 3.93   | 139.38  | 271.32  | 497.96  |
| <i>TNF</i>     | 169.07  | 12.91  | 164.14  | 95.11  | 111.82 | 98.24  | 127.04 | 49.33   | 18.68   | 148.36  |
| <i>TNFAIP3</i> | 578.04  | 767.73 | 2061.79 | 214.49 | 282.37 | 831.04 | 671.88 | 3248.92 | 3618.72 | 4100.88 |

|                  |        |        |        |        |        |        |        |        |        |         |
|------------------|--------|--------|--------|--------|--------|--------|--------|--------|--------|---------|
| <i>TNFAIP6</i>   | 3.27   | 4.44   | 21.58  | 1      | 1.6    | 1.61   | 2.62   | 1.53   | 1.84   | 5.85    |
| <i>TNFRSF10C</i> | 29.39  | 1      | 58.01  | 1      | 1      | 17.4   | 19.65  | 43.77  | 56.58  | 406.66  |
| <i>TNFRSF11A</i> | 13.31  | 1      | 1.58   | 1      | 1      | 1      | 2.62   | 1.11   | 2.11   | 2.23    |
| <i>TNFRSF13B</i> | 1      | 1      | 1.58   | 6.09   | 5.74   | 1      | 2.62   | 1.11   | 2.11   | 2.23    |
| <i>TNFRSF13C</i> | 1      | 4.44   | 1.58   | 167.14 | 231.22 | 1      | 318.26 | 3.75   | 2.11   | 2.23    |
| <i>TNFRSF14</i>  | 75.62  | 92.68  | 137.22 | 38.48  | 48.24  | 148.94 | 53.7   | 91.58  | 111.32 | 172.85  |
| <i>TNFRSF17</i>  | 1      | 1      | 1.58   | 1      | 1      | 1      | 2.62   | 1.11   | 2.11   | 2.23    |
| <i>TNFRSF1B</i>  | 453.44 | 158.25 | 450.85 | 34.63  | 52.57  | 176.68 | 77.27  | 207.2  | 199.74 | 368.81  |
| <i>TNFRSF4</i>   | 4.27   | 1      | 16.83  | 1      | 1      | 4.48   | 2.62   | 12.65  | 2.11   | 1.39    |
| <i>TNFRSF8</i>   | 16.33  | 1      | 1.58   | 1      | 1      | 1      | 1.31   | 1      | 2.11   | 2.23    |
| <i>TNFRSF9</i>   | 1      | 37.5   | 1.58   | 4.96   | 1      | 9.27   | 2.62   | 43.77  | 43.95  | 16.98   |
| <i>TNFSF10</i>   | 157.01 | 109.62 | 545.89 | 14.02  | 5.92   | 518.69 | 43.22  | 87.13  | 109.21 | 1010.12 |
| <i>TNFSF11</i>   | 1      | 1      | 1.58   | 1.1    | 1      | 1.61   | 2.62   | 12.65  | 2.11   | 2.23    |
| <i>TNFSF12</i>   | 159.02 | 74.1   | 48.51  | 1.78   | 1      | 75.28  | 3.93   | 83.8   | 81.84  | 250.79  |
| <i>TNFSF13B</i>  | 190.17 | 1.98   | 132.46 | 1.1    | 1      | 112.59 | 2.62   | 12.65  | 14.47  | 97.14   |
| <i>TNFSF15</i>   | 1.26   | 1      | 1.58   | 1      | 1      | 4.01   | 2.62   | 1.11   | 2.11   | 2.23    |
| <i>TNFSF4</i>    | 10.3   | 5.81   | 143.55 | 206.79 | 193.58 | 8.79   | 265.87 | 9.31   | 1.84   | 45.93   |
| <i>TNFSF8</i>    | 65.57  | 1      | 24.75  | 1      | 1      | 8.79   | 2.62   | 5.98   | 10.26  | 2.23    |
| <i>TOLLIP</i>    | 91.69  | 29.85  | 69.1   | 16.96  | 19.07  | 49.45  | 27.5   | 22.65  | 41.84  | 112.73  |
| <i>TP53</i>      | 57.53  | 157.43 | 27.92  | 274.29 | 232.66 | 159.46 | 265.87 | 113.81 | 168.16 | 94.92   |
| <i>TRAF1</i>     | 38.44  | 47.88  | 43.76  | 3.6    | 1.06   | 55.67  | 2.62   | 89.36  | 191.32 | 37.02   |
| <i>TRAF2</i>     | 14.32  | 46.78  | 8.91   | 21.94  | 19.25  | 36.05  | 22.26  | 44.89  | 1.84   | 12.53   |
| <i>TRAF3</i>     | 244.43 | 157.43 | 256.02 | 37.35  | 37.08  | 85.8   | 66.79  | 233.88 | 210.27 | 150.59  |
| <i>TRAF4</i>     | 32.41  | 20.56  | 32.67  | 83.56  | 83.18  | 19.31  | 140.14 | 86.02  | 58.68  | 3.62    |
| <i>TRAF5</i>     | 19.34  | 71.64  | 1      | 23.08  | 32.76  | 69.54  | 43.22  | 56     | 86.05  | 41.47   |
| <i>TRAF6</i>     | 59.54  | 44.05  | 75.44  | 35.31  | 37.08  | 61.41  | 66.79  | 83.8   | 69.21  | 161.72  |
| <i>TUBB</i>      | 179.11 | 388.55 | 268.69 | 448.49 | 541.17 | 391.45 | 326.11 | 106.03 | 147.11 | 188.44  |
| <i>TYK2</i>      | 99.73  | 134.48 | 170.48 | 80.16  | 60.49  | 145.11 | 142.76 | 162.73 | 191.32 | 362.13  |
| <i>UBE2L3</i>    | 25.37  | 52.25  | 50.09  | 47.99  | 61.57  | 59.97  | 27.5   | 18.2   | 20.79  | 43.7    |
| <i>VCAM1</i>     | 12.31  | 12.64  | 4.16   | 1.1    | 1      | 10.22  | 2.62   | 21.54  | 29.21  | 3.62    |
| <i>VTN</i>       | 1      | 1      | 1.58   | 1      | 1      | 1      | 2.62   | 1.11   | 2.11   | 2.23    |

|               |       |        |        |        |        |        |        |        |        |         |
|---------------|-------|--------|--------|--------|--------|--------|--------|--------|--------|---------|
| <i>XBPI</i>   | 218.3 | 173.27 | 354.23 | 619.96 | 652.47 | 143.2  | 478.04 | 257.23 | 121.84 | 1858.52 |
| <i>XCLI</i>   | 1     | 1      | 1.58   | 1      | 1      | 1      | 3.93   | 1.53   | 2.11   | 2.23    |
| <i>XCRI</i>   | 1     | 1      | 1.58   | 1      | 1      | 1      | 3.93   | 1.11   | 2.11   | 2.23    |
| <i>ZAP70</i>  | 68.58 | 492.36 | 129.3  | 83.11  | 50.76  | 302.01 | 77.27  | 477.35 | 549.22 | 166.17  |
| <i>ZBTB16</i> | 21.35 | 1.98   | 1.58   | 1      | 1.6    | 10.7   | 6.55   | 11.53  | 2.11   | 2.23    |
| <i>ZEB1</i>   | 15.32 | 27.66  | 26.33  | 11.3   | 13.48  | 14.53  | 11.79  | 73.79  | 35.53  | 2.23    |

---
